# Supplementary material for: Targeting fibroblast growth factor receptors causes severe craniofacial malformations in zebrafish larvae
Source: PeerJ. 2022 Nov 23;10:e14338. doi: 10.7717/peerj.14338 (PMC9700454; doi:10.7717/peerj.14338)
Supplement: Supplemental Information 1 [file peerj-10-14338-s001.xlsx]

## Sheet: All bone
	Fish	ps	ot	c	nt	cb5	t	op	br1	eb		Bone:												ps	ot	c	nt	cb5	t	op	br1	eb		aanw	afw
ho	1	v	v	v	v	v	v	v	v	v												ho	1	1	1	1	1	1	1	1	0	1		8	1
het	2	v	v	v	v	v	v	v	v	v	1	ps: parasphenoid										het	2	1	1	1	1	1	1	1	1	1		9	0
ho	3	v	v	v	v	v	v	v	v	v	2	ot: otolith										ho	3	1	1	1	1	1	1	1	1	1		9	0
ho	4	v	v	v	v	v	v	v	x	x	3	c: cleithrum										ho	4	1	1	1	1	1	1	1	0	0		7	2
wt	5	v	v	v	v	v	v	v	x	x	4	nt: notochord										wt	5	1	1	1	1	1	1	1	1	1		9	0
ho	6	v	v	v	v	v	v	v	v	v	5	cb5: ceratobranchial 5										ho	6	1	1	1	1	1	1	1	1	1		9	0
ho	7	v	v	v	v	v	v	v	v	v	6	t: teeth										ho	7	1	1	1	1	1	1	1	1	1		9	0
ho	8	v	v	v	v	v	v	v	x	v	7	op: opercle										ho	8	1	1	1	1	1	1	1	0	1		8	1
ho	9	v	v	v	v	v	v	v	v	v	8	br1: branchiostegal ray 1										ho	9	1	1	1	1	1	1	1	1	1		9	0
ho	10	v	v	v	v	v	v	v	x	x	9	eb: entopterygoid bone										ho	10	1	1	1	1	1	1	1	0	0		7	2
ho	11	v	v	v	v	v	v	v	v	v												ho	11	1	1	1	1	1	1	1	1	1		9	0
ho	12	v	v	v	v	v	v	v	v	v												ho	12	1	1	1	1	1	1	1	0	1		8	1
ho	13	v	v	v	v	v	v	v	v	v												ho	13	1	1	1	1	1	1	1	0	1		8	1
ho	14	v	v	v	v	v	v	v	v	v												ho	14	1	1	1	1	1	1	1	1	1		9	0
ho	15	v	v	v	v	v	v	v	v	v												ho	15	1	1	1	1	1	1	1	0	1		8	0
ho	16	v	v	v	v	v	v	v	v	v												ho	16	1	1	1	1	1	1	1	1	1		9	0
het	17	v	v	v	v	x	x	x	x	x	dark											het	17	1	1	1	1	1	0	1	0	0	dark	6	3
het	18	v	v	v	v	v	v	v	x	x	dark											het	18	1	1	1	1	1	1	1	0	0	dark	7	2
wt	19	v	v	v	v	v	v	v	v	x												wt	19	1	1	1	1	1	1	1	1	0		8	1
wt	20	v	v	v	v	v	v	v	x	+/-	dark											wt	20	1	1	1	1	1	1	1	0	1	dark	8	1
		ps	ot	c	nt	cb5	t	op	br1	ep												het	21	1	1	1	1	1	1	1	0	0	dark	7	2
het	21	v	v	v	v	v	v	v	x	x	dark											het	22	1	1	1	1	1	1	1	0	0	dark	7	2
het	22	x	v	v	v	v	v	v	x	x	dark											het	23	1	1	1	1	1	1	1	0	0		7	2
het	23	v	v	v	v	v	v	v	x	x												het	24	1	1	1	1	1	1	1	1	1		9	0
het	24	v	v	v	v	v	v	v	v	v												het	25	1	1	1	1	1	1	1	0	1		8	1
het	25	v	v	v	v	v	v	v	x	v												wt	26	1	1	1	1	1	1	1	1	1		9	0
wt	26	v	v	v	v	v	v	v	v	v												het	27	1	1	1	1	1	1	1	1	1		9	0
het	27	v	v	v	v	v	v	v	v	v												wt	28	1	1	1	1	1	1	1	1	1		9	0
wt	28	v	v	v	v	v	v	v	v	v												wt	29	1	1	1	1	1	1	1	1	1		9	0
wt	29	v	v	v	v	v	v	v	v	v												het	30	1	1	1	1	1	1	1	1	0		8	1
het	30	v	v	v	v	v	v	v	v	x												het	31	1	1	1	1	1	1	1	0	1		8	1
het	31	v	v	v	v	v	v	v	x	+/-												wt	32	1	1	1	1	1	1	1	1	1		9	0
wt	32	v	v	v	v	v	v	v	v	v												ho	33	1	1	1	1	1	1	1	1	1		9	0
ho	33	v	v	v	v	v	v	v	v	+/-												ho	34	1	1	1	1	1	1	1	1	1		9	0
ho	34	v	v	v	v	v	v	v	x	v												het	35	1	1	1	1	1	1	1	0	1		8	1
het	35	v	v	v	v	v	v	v	x	+/-												wt	36	1	1	1	1	1	1	1	1	1		9	0
wt	36	v	v	v	v	v	v	v	v	v												het	37	1	1	1	1	1	1	1	1	1		9	0
het	37	v	v	v	v	v	v	v	v	v												het	38	1	1	1	1	1	1	1	0	1		8	1
het	38	v	v	v	v	v	v	v	+/-	+/-												het	39	1	1	1	1	1	1	1	1	1		9	0
het	39	v	v	v	v	v	v	v	v	v												het	40	1	1	1	1	1	1	1	1	1		9	0
het	40	v	v	v	v	v	v	v	v	v												wt	41	1	1	1	1	1	1	1	1	1		9	0
		ps	ot	c	nt	cb5	t	op	br1	ep												ho	42	1	0	1	1	1	1	1	1	0		7	2
wt	41	v	v	v	v	v	v	v	v	+/-												ho	43	1	1	1	1	1	1	1	1	1		9	0
ho	42	v	x	v	v	v	v	v	v	x												ho	44	0	1	1	1	1	1	0	0	0	dark	5	4
ho	43	v	v	v	v	v	v	v	v	v												het	45	1	1	1	1	1	1	1	1	0		8	1
ho	44	x	v	v	v	v	v	x	x	x	dark											ho	46	1	1	1	1	1	1	1	1	1		9	0
het	45	v	v	v	v	v	v	v	v	+/-												wt	47	1	1	1	1	1	1	1	1	1		9	0
ho	46	v	v	v	v	v	v	v	v	v												ho	48	1	1	1	1	1	1	1	0	0		7	2
wt	47	v	v	v	v	v	v	v	v	v											1	het	49										dark		0
ho	48	v	v	v	v	v	v	v	x	x											2	het	50										dark		0
het	49	v	v	v				v			dark										3	wt	51										dark		0
het	50	v	v	v	v	v	v	v			dark										4	wt	52										dark		0
wt	51	v	v					v			dark										5	het	53										dark		0
wt	52		v								dark										6	wt	54										dark		0
het	53	v	v	v				v			dark										7	-	55										dark
wt	54	v	v								dark										8	-	56										dark
-	55										dark										9	-	57										dark
-	56																				10	het	58										dark
-	57																				11	het	59										dark
het	58																				12	het	60										dark
het	59																				13	het	61										dark
het	60																				14	ho	62										dark
		ps	ot	c	nt	cb5	t	op	br1	ep											15	wt	63										dark
het	61										dark										16	ho	64										dark
ho	62																				17	ho	65										dark
wt	63																				18	ho	66										dark
ho	64																				19	wt	67										dark
ho	65																				20	ho	68										dark
ho	66																				21	het	69										dark
wt	67																				22	het	70										dark
ho	68																				23	het	71										dark
het	69																				24	ho	72										dark					WT
het	70																					wt	73	1	1	1	1	1	1	1	0	1		8	2						aanw	afw		aanw	afw
het	71																					ho	74	1	1	1	1	1	1	1	0	0		7	2		1	ps: parasphenoid			17	0	17	100	0
ho	72																					wt	75	1	1	1	1	1	1	1	1	1		9	0		2	ot: otolith			15	2	17	88.2353	11.7647
wt	73	x	v	v	v	v	v	v	x	v												wt	76	1	1	1	1	1	1	1	0	1		8	1		3	c: cleithrum			17	0	17	100	0
ho	74	v	v	v	v	v	v	v	x	x												wt	77	1	1	1	1	1	1	1	0	1		8	1		4	nt: notochord			17	0	17	100	0
wt	75	v	v	v	v	v	v	v	v	v												ho	78	1	1	1	1	1	1	1	0	1		8	1		5	cb5: ceratobranchial 5			17	0	17	100	0
wt	76	v	v	v	v	v	v	v	x	+/-												het	79	1	1	1	1	1	1	1	0	0		7	2		6	t: teeth			17	0	17	100	0
wt	77	v	v	v	v	v	v	v	x	v												het	80	1	1	1	1	1	1	1	0	1		8	1		7	op: opercle			17	0	17	100	0
ho	78	v	v	v	v	v	v	v	x	x												ho	81	1	1	1	1	1	1	1	0	0		7	2		8	br1: branchiostegal ray 1			12	5	17	70.5882	29.4118
het	79	v	v	v	v	v	v	v	x	x												ho	82	1	1	1	1	1	1	1	0	0		7	2		9	eb: entopterygoid bone			16	1	17	94.1176	5.88235
het	80	v	v	v	v	v	v	v	v	v												het	83	1	1	1	1	1	1	1	1	1		9	0
		ps	ot	c	nt	cb5	t	op	br1	ep												wt	84	1	1	1	1	1	1	1	1	1		9	0			HET
ho	81	v	v	v	v	v	v	v	x	x												wt	85	1	1	1	1	1	1	1	1	1		9	0					aanw	afw		aanw	afw
ho	82	v	v	v	v	v	v	v	x	x												het	86	1	1	1	1	1	1	1	1	1		9	0		1	ps: parasphenoid		31	0	31	100	0					8:br1
het	83	v	v	v	v	v	v	v	v	v												het	87	1	1	1	1	1	1	1	0	1		8	1		2	ot: otolith		29	2	31	93.5484	6.45161					WT
wt	84	v	v	v	v	v	v	v	v	v												ho	88	1	1	1	1	0	1	1	0	0		6	3		3	c: cleithrum		31	0	31	100	0					HE
wt	85	v	v	v	v	v	v	v	v	v												het	89	1	1	1	1	1	1	1	0	0		7	2		4	nt: notochord		31	0	31	100	0					HO
het	86	v	v	v	v	v	v	v	v	v												het	90	1	1	1	1	1	1	1	1	1		9	0		5	cb5: ceratobranchial 5		31	0	31	100	0
het	87	v	v	v	v	v	v	v	v	v												het	91	1	1	1	1	1	1	1	1	1		9	0		6	t: teeth		30	1	31	96.7742	3.22581
ho	88	v	v	v	v	v	v	v	x	x												het	92	1	1	1	1	1	1	1	1	1		9	0		7	op: opercle		31	0	31	100	0
het	89	v	v	v	v	v	v	v	x	+/-												het	93	1	1	1	1	1	1	1	1	1		9	0		8	br1: branchiostegal ray 1		15	16	31	48.3871	51.6129
het	90	v	v	v	v	v	v	v	v	v												wt	94	1	1	1	1	1	1	1	1	1		9	0		9	eb: entopterygoid bone		16	15	31	51.6129	48.3871					9:eb
het	91	v	v	v	v	v	v	v	v	v												ho	95	1	1	1	1	1	1	1	1	1		9	0														WT
het	92	v	v	v	v	v	v	v	v	v												het	96	1	1	1	1	1	1	1	1	1		9	0			HO											HE
het	93	v	v	v	v	v	v	v	v	v													Fish	ps	ot	c	nt	cb5	t	op	br1	ep								aanw	afw		aanw	afw					HO
wt	94	v	v	v	v	v	v	v	v	v																											1	ps: parasphenoid		25	1	26	96.1538	3.84615
ho	95	v	v	v	v	v	v	v	v	v													72		36												2	ot: otolith		25	1	26	96.1538	3.84615
het	96	v	v	v	v	v	v	v	v	v																											3	c: cleithrum		26	0	26	100	0
																																					4	nt: notochord		26	0	26	100	0
																																					5	cb5: ceratobranchial 5		25	1	26	96.1538	3.84615
																									cat 1	cat 2	cat 3	cat 4									6	t: teeth		26	0	26	100	0
																							wt		12	5	0	0									7	op: opercle		25	1	26	96.1538	3.84615
																							het		12	18	1	0									8	br1: branchiostegal ray 1		13	13	26	50	50
																							ho		11	15	2	0									9	eb: entopterygoid bone		18	8	26	69.2308	30.7692
[truncated: 3 more columns]

## Sheet: Wt
	Fish	ps	ot	ot #	c	nt	cb5	t	op	br1	eb
1	5	v	x	0	v	v	v	v	v	v	v		2		wt					aanw	afw		aanw	afw
2	19	v	v	4	v	v	v	v	v	x	x		1		wt	1	ps: parasphenoid			17	0	17	100	0
3	20	v	v	4	v	v	v	v	v	x	v	dark	1		wt	2	ot: otolith			15	2	17	88.2353	11.7647
4	26	v	v	4	v	v	v	v	v	v	v		0		wt	3	c: cleithrum			17	0	17	100	0
5	28	v	x	0	v	v	v	v	v	v	v		0		wt	4	nt: notochord			17	0	17	100	0
6	29	v	v	4	v	v	v	v	v	v	v		0		wt	5	cb5: ceratobranchial 5			17	0	17	100	0
7	32	v	v	4	v	v	v	v	v	v	v		0		wt	6	t: teeth			17	0	17	100	0
8	36	v	v	4	v	v	v	v	v	v	v		0		wt	7	op: opercle			17	0	17	100	0
9	41	v	v	4	v	v	v	v	v	v	v		0		wt	8	br1: branchiostegal ray 1			12	5	17	70.5882	29.4118
10	47	v	v	4	v	v	v	v	v	v	v		0		wt	9	eb: entopterygoid bone			16	1	17	94.1176	5.88235
11	73	v	v	4	v	v	v	v	v	x	v		1		wt
12	75	v	v	4	v	v	v	v	v	v	v		0		wt
13	76	v	v	4	v	v	v	v	v	x	v		1		wt
14	77	v	v	4	v	v	v	v	v	x	v		1		wt
15	84	v	v	4	v	v	v	v	v	v	v		0		wt
16	85	v	v	4	v	v	v	v	v	v	v		0		wt
17	94	v	v	4	v	v	v	v	v	v	v		0		wt
	12	70.5882				alles aanwezig
	5	29.4118				max 2 afwezig
	0	0				3- 4 afwezig
	0	0				5 of meer afwezig
	17	100
		cat 1	cat 2	cat 3	cat 4
	wt	12	5	0	0

## Sheet: Het
	Fish	ps	ot	ot #	c	nt	cb5	t	op	br1	eb
1	2	v	v	4	v	v	v	v	v	v	v		0		het				aanw	afw		aanw	afw
2	17	v	v	4	v	v	v	x	v	x	x	dark	3		het	1	ps: parasphenoid		31	0	31	100	0
3	18	v	v	4	v	v	v	v	v	x	x	dark	2		het	2	ot: otolith		29	2	31	93.5484	6.45161
4	21	v	v	4	v	v	v	v	v	x	x	dark	2		het	3	c: cleithrum		31	0	31	100	0
5	22	v	v	4	v	v	v	v	v	x	x	dark	2		het	4	nt: notochord		31	0	31	100	0
6	23	v	v	4	v	v	v	v	v	x	x		1		het	5	cb5: ceratobranchial 5		31	0	31	100	0
7	24	v	v	4	v	v	v	v	v	v	v		0		het	6	t: teeth		30	1	31	96.7742	3.22581
8	25	v	x	0	v	v	v	v	v	x	v		1		het	7	op: opercle		31	0	31	100	0
9	27	v	v	4	v	v	v	v	v	v	v		0		het	8	br1: branchiostegal ray 1		15	16	31	48.3871	51.6129
10	30	v	v	4	v	v	v	v	v	v	x		1		het	9	eb: entopterygoid bone		16	15	31	51.6129	48.3871
11	31	v	v	4	v	v	v	v	v	x	v		1		het
12	35	v	v	4	v	v	v	v	v	x	v		1		het
13	37	v	v	4	v	v	v	v	v	v	v		1		het
14	38	v	v	4	v	v	v	v	v	x	v		1		het
15	39	v	v	4	v	v	v	v	v	v	v		0		het
16	40	v	v	4	v	v	v	v	v	v	v		0		het
17	45	v	v	4	v	v	v	v	v	v	x		1		het
18	49	v	v	4	v				v			dark	0		het
19	50	v	v	4	v	v	v	v	v			dark	0		het
20	53	v	v	4	v				v			dark	0		het
21	79	v	v	4	v	v	v	v	v	x	x		2		het
22	80	v	v	4	v	v	v	v	v	x	v		1		het
23	83	v	v	4	v	v	v	v	v	v	v		0		het
24	86	v	x	3	v	v	v	v	v	v	v		0		het
25	87	v	v	4	v	v	v	v	v	x	v		1		het
26	89	v	v	4	v	v	v	v	v	x	x		2		het
27	90	v	v	4	v	v	v	v	v	v	v		0		het
28	91	v	v	4	v	v	v	v	v	v	v		0		het
29	92	v	v	4	v	v	v	v	v	v	v		0		het
30	93	v	v	4	v	v	v	v	v	v	v		0		het
31	96	v	v	4	v	v	v	v	v	v	v		0		het
	12	38.7097			alles aanwezig
	18	58.0645			max 2 afwezig
	1	3.22581			3- 4 afwezig
	0	0			5 of meer afwezig
	31	100
		cat 1	cat 2	cat 3	cat 4
	het	12	18	1	0

## Sheet: Ho
	Fish	ps	ot	ot #	c	nt	cb5	t	op	br1	eb
1	1	v	v	4	v	v	v	v	v	x	v			0
27	3	v	v	4	v	v	v	v	v	v	v			0		ho				aanw	afw		aanw	afw
2	4	v	v	4	v	v	v	v	v	x	x			2		ho	1	ps: parasphenoid		25	1	26	96.1538	3.84615
3	6	v	v	4	v	v	v	v	v	v	v			0		ho	2	ot: otolith		25	1	26	96.1538	3.84615
4	7	v	v	4	v	v	v	v	v	v	v			0		ho	3	c: cleithrum		26	0	26	100	0
5	8	v	v	4	v	v	v	v	v	x	v			1		ho	4	nt: notochord		26	0	26	100	0
6	9	v	v	4	v	v	v	v	v	v	v			0		ho	5	cb5: ceratobranchial 5		25	1	26	96.1538	3.84615
7	10	v	v	4	v	v	v	v	v	x	x			2		ho	6	t: teeth		26	0	26	100	0
8	11	v	v	4	v	v	v	v	v	v	v			0		ho	7	op: opercle		25	1	26	96.1538	3.84615
9	12	v	v	4	v	v	v	v	v	x	v			1		ho	8	br1: branchiostegal ray 1		13	13	26	50	50
10	13	v	v	4	v	v	v	v	v	x	v			1		ho	9	eb: entopterygoid bone		18	8	26	69.2308	30.7692
11	14	v	v	4	v	v	v	v	v	v	v			0		ho
12	15	v	v	4	v	v	v	v	v	x	v			0		ho
13	16	v	v	4	v	v	v	v	v	v	v			0		ho
14	33	v	v	4	v	v	v	v	v	v	v			0		ho
15	34	v	v	4	v	v	v	v	v	v	v			0		ho
16	42	v	x	0	v	v	v	v	v	v	x			2		ho
17	43	v	v	4	v	v	v	v	v	v	v			0		ho
18	44	x	v	4	v	v	v	v	x	x	x		dark	4		ho
19	46	v	v	4	v	v	v	v	v	v	v			0		ho
20	48	v	v	4	v	v	v	v	v	x	x			2		ho
21	74	v	v	4	v	v	v	v	v	x	x			2		ho
22	78	v	v	4	v	v	v	v	v	x	v			1		ho
23	81	v	v	4	v	v	v	v	v	x	x			2		ho
24	82	v	v	4	v	v	v	v	v	x	x			2		ho
25	88	v	v	4	v	v	x	v	v	x	x			3		ho
26	95	v	v	4	v	v	v	v	v	v	v			0		ho
																ho
	11	39.2857	alles aanwezig
	15	53.5714	max 2 afwezig
	2	7.14286	3- 4 afwezig
	0	0	5 of meer afwezig
	28	100
		cat 1	cat 2	cat 3	cat 4
	ho	11	15	2	0

## Sheet: Cartilage
	All raw data	1	2	3	4	5	6	7	8	9	10	11	12	13	14	15	16	17	18	19	20	21	22	23	24	25	26	27	28	29	30	31	32	33	34	35	36	37	38	39	40	41	42	43	44	45	46	47	48
1	Total head length	3.174	3.21	3.431	3.253	3.052	3.144	3.504	3.275	3.35	3.153	3.541	2.999	3.109	3.463	3.217	3.588	2.737	3.044	3.335	2.845	2.825	2.776	3.267	3.579	3.497	3.613	3.52	3.406	3.341	3.334	3.346	3.294	3.381	3.535	3.307	3.406	3.66	3.19	3.51	3.72	3.72	3.58	3.49	x	3.23	3.29	3.22	3.22
2	length ceratohyal to anterior end	0.692	0.98	1.102	1.004	0.938	0.962	1.08	1.115	1.193	0.833	0.981	0.966	0.823	0.946	0.766	1.114	0.743	0.847	1.032	0.786	0.698	0.771	0.942	1.1	1.014	1.057	0.873	0.92	0.957	0.78	1.035	0.928	0.907	1.151	1.008	0.915	1.21	0.92	0.97	1.15	1.08	1.1	1.03	x	0.99	0.97	0.95	0.83
3	length ceratohyal to posterior end	2.482	2.23	2.329	2.249	2.114	2.182	2.424	2.16	2.157	2.32	2.56	2.033	2.286	2.517	2.451	2.474	1.994	2.197	2.303	2.059	2.127	2.005	2.325	2.479	2.483	2.556	2.647	2.486	2.384	2.554	2.311	2.366	2.474	2.384	2.299	2.491	2.45	2.27	2.54	2.57	2.64	2.48	2.46	x	2.24	2.32	2.27	2.39
4	Width MP	1.359	1.335	1.013	1.284	1.046	1.397	1.053	1.26	1.185	1.294	1.549	1.109	1.333	1.413	0.933	1.14	1.114	1.115	1.272	1.288	0.94	0.987	1.349	1.241	1.358	1.238	1.373	1.263	1.48	1.307	1.434	1.207	1.414	1.334	1.431	1.36	0.97	1.08	1.38	1.22	0.89	1.23	1.24	x	1.35	1.34	1.36	1.06
5	Width CP	1.741	1.661	1.5	1.756	1.733	1.717	1.402	1.773	1.552	1.581	1.956	1.723	1.758	1.646	1.4	1.838	1.481	1.616	1.762	1.611	1.08	1.44	1.976	1.724	1.623	1.71	1.854	1.645	1.716	1.794	1.863	1.508	1.94	1.958	1.892	1.714	1.67	1.62	1.87	1.78	1.46	1.89	1.82	x	1.73	1.82	1.79	1.55
6	Lenght ceratihyal (superior)(above)	1.052	1.048	1.086	1.177	0.964	1.019	1.153	1.076	1.053	0.959	1.118	1.222	1.186	1.04	1.091	1.005	1.016	1.156	1.062	1.073	1.026	0.99	1.114	1.169	1.091	1.136	1.198	1.036	1.143	1.061	1.094	1.068	1.124	1.169	1.146	1.192	0.98	1.15	1.17	1.19	1.23	1.15	1.16	x	1.04	1.13	1.11	1.06
7	Lenght ceratihyal (interior)(below)	0.984	1.09	1.056	1.049	0.996	0.949	1.199	1.101	1.01	1.011	1.149	1.2	1.09	1.023	1.015	1.051	1.113	1.21	1.345	1.184	1.073	1.041	1.137	1.187	1.096	1.245	1.183	1.113	1.107	1.133	1.127	1.099	1.109	1.099	1.231	1.214	1.15	1.22	1.15	1.21	1.2	1.18	1.15	x	1.06	1.12	1.12	1.03
8	Length of the ethmoid plate (ET)	1.566	1.691	1.764	1.645	1.523	1.546	1.707	1.701	1.663	1.647	1.642	1.636	1.238	1.541	1.608	1.738	1.506	1.733	1.944	1.336	1.476	1.342	2.112	1.8	1.749	1.759	1.932	1.859	1.635	1.762	1.705	1.793	1.708	1.645	1.797	1.667	1.82	1.89	1.77	1.84	1.86	1.79	1.81	x	1.77	1.48	1.77	1.73
9	Lateral length Meckel’s cartilage (MC)	0.75	0.748	0.813	0.651	0.701	0.596	0.8	0.642	0.923	0.684	0.596	0.659	0.6	0.756	0.839	0.605	0.739	0.681	0.724	0.622	0.671	0.798	0.568	0.685	0.766	0.685	0.736	0.687	0.531	0.798	0.565	0.689	0.707	0.694	0.628	0.546	0.74	0.84	0.9	0.97	0.89	0.72	0.74	x	0.73	0.9	0.78	0.72
	2 = 200um
	Conversion	1	2	3	4	5	6	7	8	9	10	11	12	13	14	15	16	17	18	19	20	21	22	23	24	25	26	27	28	29	30	31	32	33	34	35	36	37	38	39	40	41	42	43	44	45	46	47	48
1	Total head length	317.4	321	343.1	325.3	305.2	314.4	350.4	327.5	335	315.3	354.1	299.9	310.9	346.3	321.7	358.8	273.7	304.4	333.5	284.5	282.5	277.6	326.7	357.9	349.7	361.3	352	340.6	334.1	333.4	334.6	329.4	338.1	353.5	330.7	340.6	366	319	351	372	372	358	349		323	329	322	322
2	length ceratohyal to anterior end	69.2	98	110.2	100.4	93.8	96.2	108	111.5	119.3	83.3	98.1	96.6	82.3	94.6	76.6	111.4	74.3	84.7	103.2	78.6	69.8	77.1	94.2	110	101.4	105.7	87.3	92	95.7	78	103.5	92.8	90.7	115.1	100.8	91.5	121	92	97	115	108	110	103		99	97	95	83
3	length ceratohyal to posterior end	248.2	223	232.9	224.9	211.4	218.2	242.4	216	215.7	232	256	203.3	228.6	251.7	245.1	247.4	199.4	219.7	230.3	205.9	212.7	200.5	232.5	247.9	248.3	255.6	264.7	248.6	238.4	255.4	231.1	236.6	247.4	238.4	229.9	249.1	245	227	254	257	264	248	246		224	232	227	239
4	Width MP	135.9	133.5	101.3	128.4	104.6	139.7	105.3	126	118.5	129.4	154.9	110.9	133.3	141.3	93.3	114	111.4	111.5	127.2	128.8	94	98.7	134.9	124.1	135.8	123.8	137.3	126.3	148	130.7	143.4	120.7	141.4	133.4	143.1	136	97	108	138	122	89	123	124		135	134	136	106
5	Width CP	174.1	166.1	150	175.6	173.3	171.7	140.2	177.3	155.2	158.1	195.6	172.3	175.8	164.6	140	183.8	148.1	161.6	176.2	161.1	108	144	197.6	172.4	162.3	171	185.4	164.5	171.6	179.4	186.3	150.8	194	195.8	189.2	171.4	167	162	187	178	146	189	182		173	182	179	155
6	Lenght ceratihyal (superior)(above)	105.2	104.8	108.6	117.7	96.4	101.9	115.3	107.6	105.3	95.9	111.8	122.2	118.6	104	109.1	100.5	101.6	115.6	106.2	107.3	102.6	99	111.4	116.9	109.1	113.6	119.8	103.6	114.3	106.1	109.4	106.8	112.4	116.9	114.6	119.2	98	115	117	119	123	115	116		104	113	111	106
7	Lenght ceratihyal (interior)(below)	98.4	109	105.6	104.9	99.6	94.9	119.9	110.1	101	101.1	114.9	120	109	102.3	101.5	105.1	111.3	121	134.5	118.4	107.3	104.1	113.7	118.7	109.6	124.5	118.3	111.3	110.7	113.3	112.7	109.9	110.9	109.9	123.1	121.4	115	122	115	121	120	118	115		106	112	112	103
8	Length of the ethmoid plate (ET)	156.6	169.1	176.4	164.5	152.3	154.6	170.7	170.1	166.3	164.7	164.2	163.6	123.8	154.1	160.8	173.8	150.6	173.3	194.4	133.6	147.6	134.2	211.2	180	174.9	175.9	193.2	185.9	163.5	176.2	170.5	179.3	170.8	164.5	179.7	166.7	182	189	177	184	186	179	181		177	148	177	173
9	Lateral length Meckel’s cartilage (MC)	75	74.8	81.3	65.1	70.1	59.6	80	64.2	92.3	68.4	59.6	65.9	60	75.6	83.9	60.5	73.9	68.1	72.4	62.2	67.1	79.8	56.8	68.5	76.6	68.5	73.6	68.7	53.1	79.8	56.5	68.9	70.7	69.4	62.8	54.6	74	84	90	97	89	72	74		73	90	78	72
		ho	het	ho	ho	wt	ho	ho	ho	ho	ho	ho	ho	ho	ho	ho	ho	het	het	wt	wt	het	het	het	het	het	wt	het	wt	wt	het	het	wt	ho	ho	het	wt	het	het	het	het	wt	ho	ho	ho	het	ho	wt	ho
		1	2	3	4	5	6	7	8	9	10	11	12	13	14	15	16	17
	WT	5	19	20	26	28	29	32	36	41	47	73	75	76	77	84	85	94		Gem	SD
1	Total head length	305.2	333.5	284.5	361.3	340.6	334.1	329.4	340.6	372	322	398.3	363.4	345.9	358.9	302.5	352.3	359.2		341.394	27.1323
2	length ceratohyal to anterior end	93.8	103.2	78.6	105.7	92	95.7	92.8	91.5	108	95	111.3	96.1	87.5	97.4	90.2	94	110.3		96.6529	8.36063
3	length ceratohyal to posterior end	211.4	230.3	205.9	255.6	248.6	238.4	236.6	249.1	264	227	287	267.3	258.4	261.5	212.3	258.3	248.9		244.741	21.4043
4	Width MP	104.6	127.2	128.8	123.8	126.3	148	120.7	136	89	136	97.1	110.1	90.1	109.4	113	114.2	135.4		118.218	16.4006
5	Width CP	173.3	176.2	161.1	171	164.5	171.6	150.8	171.4	146	179	158.5	168.7	168.6	142.3	161.6	154.2	178.4		164.541	10.7849																											1	Total head length
6	Lenght ceratihyal (superior)(above)	96.4	106.2	107.3	113.6	103.6	114.3	106.8	119.2	123	111	122.9	118.8	107.4	112.8	105.2	116.1	116.6		111.835	7.06682																											2	length ceratohyal to anterior end
7	Lenght ceratihyal (interior)(below)	99.6	134.5	118.4	124.5	111.3	110.7	109.9	121.4	120	112	125.6	129.2	114.4	123.2	108.6	115.1	112.1		117.088	8.43389																											3	length ceratohyal to posterior end
8	Length of the ethmoid plate (ET)	152.3	194.4	133.6	175.9	185.9	163.5	179.3	166.7	186	177	204.3	191	160.6	186.5	174	189	171.7		175.982	16.6547																											4	Width MP
9	Lateral length Meckel’s cartilage (MC)	70.1	72.4	62.2	68.5	68.7	53.1	68.9	54.6	89	78	86.4	86.7	80.2	83.2	68	83.6	97.5		74.7706	11.8916																											5	Width CP
																																																6	Lenght ceratihyal (superior)(above)
		1	2	3	4	5	6	7	8	9	10	11	12	13	14	15	16	17	18	19	20	21	22	23	24	25	26	27	28																			7	Lenght ceratihyal (interior)(below)
	Heterozygotes	2	17	18	21	22	23	24	25	27	30	31	35	37	38	39	40	45	79	80	83	86	87	89	90	91	92	93	96		Gem	SD																8	Length of the ethmoid plate (ET)
1	Total head length	321	273.7	304.4	282.5	277.6	326.7	357.9	349.7	352	333.4	334.6	330.7	366	319	351	372	323	312	370.9	335.8	362	323.3	342.3	326.9	339.4	344.4	346.1	347.1		333.05	25.4395																9	Lateral length Meckel’s cartilage (MC)
2	length ceratohyal to anterior end	98	74.3	84.7	69.8	77.1	94.2	110	101.4	87.3	78	103.5	100.8	121	92	97	115	99	97.3	110.1	111.5	112.8	122	127	82.9	78.3	84	101.1	130.4		98.5893	16.2306
3	length ceratohyal to posterior end	223	199.4	219.7	212.7	200.5	232.5	247.9	248.3	264.7	255.4	231.1	229.9	245	227	254	257	224	214.7	260.8	224.3	249.2	201.3	215.3	244	261.1	260.4	245	216.7		234.461	19.7337
4	Width MP	133.5	111.4	111.5	94	98.7	134.9	124.1	135.8	137.3	130.7	143.4	143.1	97	108	138	122	135	99.3	110.8	95.7	113.3	120.8	115.6	124	104.7	117.1	96.1	126.5		118.654	15.4195
5	Width CP	166.1	148.1	161.6	108	144	197.6	172.4	162.3	185.4	179.4	186.3	189.2	167	162	187	178	173	164.7	164.4	166.8	152.4	166.4	171.3	168.8	158.8	176.6	137.3	175.3		166.793	17.6078
6	Lenght ceratihyal (superior)(above)	104.8	101.6	115.6	102.6	99	111.4	116.9	109.1	119.8	106.1	109.4	114.6	98	115	117	119	104	110.8	107.1	110.6	114.5	89.9	103.9	106.8	117.3	120.4	116.3	105		109.518	7.37665
7	Lenght ceratihyal (interior)(below)	109	111.3	121	107.3	104.1	113.7	118.7	109.6	118.3	113.3	112.7	123.1	115	122	115	121	106	111.8	106.5	111.9	110.3	105.9	102.9	116.3	119.4	115.2	125	106.1		113.3	6.04093
8	Length of the ethmoid plate (ET)	169.1	150.6	173.3	147.6	134.2	211.2	180	174.9	193.2	176.2	170.5	179.7	182	189	177	184	177	174.2	181.1	172.9	198.4	171.2	169.6	183.1	188.2	187	182.5	170.6		176.725	14.763
9	Lateral length Meckel’s cartilage (MC)	74.8	73.9	68.1	67.1	79.8	56.8	68.5	76.6	73.6	79.8	56.5	62.8	74	84	90	97	73	69.1	85.1	78.8	91	74.9	76.9	76.9	83	91.6	83.9	78.5		76.6429	9.62027
		1	2	3	4	5	6	7	8	9	10	11	12	13	14	15	16	17	18	19	20	21	22	23	24	25	26
	Homozygotes	1	3	4	6	7	8	9	10	11	12	13	14	15	16	33	34	42	43	46	48	74	78	81	82	88	95		Gem	SD
1	Total head length	317.4	343.1	325.3	314.4	350.4	327.5	335	315.3	354.1	299.9	310.9	346.3	321.7	358.8	338.1	353.5	358	349	329	322	276.7	325.1	281.9	302.3	315	346.4		327.581	21.4221
2	length ceratohyal to anterior end	69.2	110.2	100.4	96.2	108	111.5	119.3	83.3	98.1	96.6	82.3	94.6	76.6	111.4	90.7	115.1	110	103	97	83	76	103.8	82.5	89.5	95.3	98		96.2154	12.6669
3	length ceratohyal to posterior end	248.2	232.9	224.9	218.2	242.4	216	215.7	232	256	203.3	228.6	251.7	245.1	247.4	247.4	238.4	248	246	232	239	200.7	221.3	199.4	212.8	219.7	248.4		231.365	16.1664
4	Width MP	135.9	101.3	128.4	139.7	105.3	126	118.5	129.4	154.9	110.9	133.3	141.3	93.3	114	141.4	133.4	123	124	134	106	86.7	94.2	117.3	116.1	107.4	113.5		120.354	16.2543
5	Width CP	174.1	150	175.6	171.7	140.2	177.3	155.2	158.1	195.6	172.3	175.8	164.6	140	183.8	194	195.8	189	182	182	155	148	127.9	170	162.8	147.8	156.2		167.108	17.6977
6	Lenght ceratihyal (superior)(above)	105.2	108.6	117.7	101.9	115.3	107.6	105.3	95.9	111.8	122.2	118.6	104	109.1	100.5	112.4	116.9	115	116	113	106	107.9	101.4	109.6	105	103.9	116.1		109.496	6.2907
7	Lenght ceratihyal (interior)(below)	98.4	105.6	104.9	94.9	119.9	110.1	101	101.1	114.9	120	109	102.3	101.5	105.1	110.9	109.9	118	115	112	103	111.7	108.4	104.5	109.1	112.2	110		108.208	6.22831
8	Length of the ethmoid plate (ET)	156.6	176.4	164.5	154.6	170.7	170.1	166.3	164.7	164.2	163.6	123.8	154.1	160.8	173.8	170.8	164.5	179	181	148	173	159.7	164.9	157.8	169.4	168.9	161.1		163.935	10.9244
9	Lateral length Meckel’s cartilage (MC)	75	81.3	65.1	59.6	80	64.2	92.3	68.4	59.6	65.9	60	75.6	83.9	60.5	70.7	69.4	72	74	90	72	61.9	70.1	69.8	54	64.1	75.1		70.5577	9.14368
	Percentage
		1	2	3	4	5	6	7	8	9	10	11	12	13	14	15	16	17	18	19	20	21	22	23	24	25	26	27	28		Gem	SD
	Heterozygotes	2	17	18	21	22	23	24	25	27	30	31	35	37	38	39	40	45	79	80	83	86	87	89	90	91	92	93	96
1	Total head length	94.0262	80.1713	89.1638	82.7489	81.3136	95.6958	104.835	102.433	103.107	97.6584	98.0099	96.8675	107.207	93.4404	102.814	108.965	94.6121	91.39	108.643	98.3614	106.036	94.6999	100.265	95.7544	99.4159	100.88	101.378	101.671		97.5559	7.45166
2	length ceratohyal to anterior end	101.394	76.873	87.6331	72.2172	79.7699	97.4621	113.809	104.911	90.3232	80.7011	107.084	104.291	125.19	95.1859	100.359	118.982	102.428	100.669	113.913	115.361	116.706	126.225	131.398	85.7708	81.0115	86.9089	104.601	134.916		102.003	16.7927
3	length ceratohyal to posterior end	91.1167	81.4738	89.7683	86.9081	81.9233	94.9983	101.291	101.454	108.155	104.355	94.4263	93.936	100.106	92.751	103.783	105.009	91.5253	87.7253	106.562	91.6478	101.822	82.2502	87.9705	99.6972	106.684	106.398	100.106	88.5425		95.7995	8.0631
4	Width MP	112.927	94.233	94.3176	79.5144	83.4901	114.112	104.976	114.873	116.142	110.559	121.302	121.048	82.052	91.3569	116.734	103.199	114.196	83.9976	93.7254	80.9524	95.8402	102.184	97.7857	104.891	88.5655	99.0546	81.2907	107.006		100.369	13.0433
5	Width CP	100.947	90.0079	98.2125	65.6371	87.5161	120.092	104.776	98.6379	112.677	109.03	113.224	114.986	101.494	98.4556	113.649	108.18	105.141	100.097	99.9142	101.373	92.6212	101.13	104.108	102.588	96.5108	107.329	83.4442	106.539		101.368	10.7011
6	Lenght ceratihyal (superior)(above)	93.7092	90.8479	103.366	91.7421	88.523	99.6108	104.529	97.5542	107.122	94.8717	97.8224	102.472	87.6289	102.83	104.618	106.406	92.9939	99.0743	95.7658	98.8954	102.383	80.3861	92.9045	95.4976	104.886	107.658	103.992	93.8881		97.9278	6.596
7	Lenght ceratihyal (interior)(below)	93.0922	95.0565	103.341	91.6403	88.9073	97.1063	101.377	93.6046	101.035	96.7646	96.2522	105.134	98.2165	104.195	98.2165	103.341	90.53	95.4835	90.957	95.569	94.2025	90.4446	87.8824	99.3268	101.974	98.3873	106.757	90.6154		96.7646	5.1593
8	Length of the ethmoid plate (ET)	96.0892	85.5768	98.4758	83.872	76.2576	120.012	102.283	99.385	109.784	100.124	96.8847	102.113	103.419	107.397	100.578	104.556	100.578	98.9872	102.908	98.2485	112.739	97.2825	96.3733	104.045	106.943	106.261	103.704	96.9415		100.422	8.38891
9	Lateral length Meckel’s cartilage (MC)	100.039	98.8357	91.0786	89.7412	106.726	75.9657	91.6136	102.447	98.4344	106.726	75.5645	83.9902	98.9694	112.344	120.368	129.73	97.632	92.416	113.815	105.389	121.706	100.173	102.848	102.848	111.006	122.508	112.21	104.988		102.504	12.8664
		1	2	3	4	5	6	7	8	9	10	11	12	13	14	15	16	17	18	19	20	21	22	23	24	25	26		Gem	SD
	Homozygotes	1	3	4	6	7	8	9	10	11	12	13	14	15	16	33	34	42	43	46	48	74	78	81	82	88	95
1	Total head length	92.9717	100.5	95.2858	92.093	102.638	95.9302	98.1271	92.3566	103.722	87.8457	91.0678	101.437	94.2313	105.098	99.0351	103.546	104.864	102.228	96.3696	94.3191	81.05	95.2272	82.5732	88.5487	92.2687	101.466		92.437	18.9984
2	length ceratohyal to anterior end	71.5964	114.016	103.877	99.5314	111.74	115.361	123.431	86.1847	101.497	99.9452	85.15	97.876	79.2526	115.258	93.8409	119.086	113.809	106.567	100.359	85.8743	78.6319	107.395	85.3569	92.5994	98.6002	101.394		95.9344	22.6081
3	length ceratohyal to posterior end	101.413	95.1618	91.893	89.1554	99.0434	88.2565	88.1339	94.794	104.6	83.0673	93.4048	102.843	100.147	101.086	101.086	97.409	101.332	100.514	94.794	97.6542	82.005	90.4221	81.4738	86.949	89.7683	101.495		91.1445	18.5056
4	Width MP	114.957	85.6894	108.613	118.172	89.073	106.583	100.239	109.459	131.03	93.81	112.758	119.525	78.9222	96.4323	119.61	112.843	104.045	104.891	113.35	89.6651	73.3393	79.6835	99.2238	98.2087	90.8494	96.0094		98.1845	23.0267
5	Width CP	105.809	91.1626	106.721	104.351	85.2066	107.754	94.3229	96.0854	118.876	104.715	106.843	100.036	85.0851	111.705	117.904	118.998	114.865	110.611	110.611	94.2013	89.9471	77.7313	103.318	98.9418	89.8255	94.9306		97.9835	21.1713
6	Lenght ceratihyal (superior)(above)	94.0669	97.1071	105.244	91.1161	103.098	96.2129	94.1563	85.7511	99.9684	109.268	106.049	92.9939	97.5542	89.8643	100.505	104.529	102.83	103.724	101.041	94.7822	96.4812	90.6691	98.0013	93.8881	92.9045	103.813		94.5044	18.2458
7	Lenght ceratihyal (interior)(below)	84.0392	90.1884	89.5906	81.05	102.401	94.0317	86.2597	86.3451	98.1311	102.487	93.0922	87.37	86.6868	89.7614	94.7149	93.8608	100.779	98.2165	95.6544	87.9678	95.3981	92.5798	89.2489	93.1776	95.8252	93.9462		89.252	16.9854
8	Length of the ethmoid plate (ET)	88.9862	100.237	93.4753	87.8497	96.9984	96.6574	94.4981	93.5889	93.3048	92.9639	70.348	87.5656	91.3728	98.7599	97.0552	93.4753	101.715	102.851	84.0993	98.3053	90.7477	93.7026	89.6681	96.2597	95.9755	91.5433		90.0002	17.2381
9	Lateral length Meckel’s cartilage (MC)	100.307	108.733	87.0663	79.7105	106.994	85.8626	123.444	91.4798	79.7105	88.1363	80.2455	101.109	112.21	80.9142	94.5559	92.8172	96.2945	98.9694	120.368	96.2945	82.7866	93.7534	93.3522	72.2209	85.7289	100.441		91.2039	20.2349
[truncated: 28 more columns]

## Sheet: Genotyping
Fish							55	-
1	ho	A	1				56	-
2	het	B					57	-
3	ho	C					2	het	B
4	ho	D					17	het	A
5	wt	E					18	het	B
6	ho	F					21	het	E
7	ho	G					22	het	F
8	ho	H					23	het	G
9	ho	A	2				24	het	H
10	ho	B					25	het	A
11	ho	C					27	het	C
12	ho	D					30	het	F
13	ho	E					31	het	G
14	ho	F					35	het	C
15	ho	G					37	het	E
16	ho	H					38	het	F
17	het	A	3				39	het	G
18	het	B					40	het	H
19	wt	C					45	het	E
20	wt	D					49	het
21	het	E					50	het
22	het	F					53	het
23	het	G					58	het
24	het	H					59	het
25	het	A	4				60	het
26	wt	B					61	het
27	het	C					69	het
28	wt	D					70	het
29	wt	E					71	het
30	het	F					79	het
31	het	G					80	het
32	wt	H					83	het
33	ho	A	5				86	het
34	ho	B					87	het
35	het	C					89	het
36	wt	D					90	het
37	het	E					91	het
38	het	F					92	het
39	het	G					93	het
40	het	H				38	96	het
41	wt	A	6				1	ho
42	ho	B					4	ho
43	ho	C					6	ho
44	ho	D					7	ho
45	het	E					8	ho
46	ho	F					9	ho
47	wt	G					10	ho
48	ho	H					11	ho
49	het						12	ho
50	het						13	ho
51	wt						14	ho
52	wt						15	ho
53	het						16	ho
54	wt						33	ho
55	-						34	ho
56	-						42	ho
57	-						43	ho
58	het						44	ho
59	het						46	ho
60	het						48	ho
61	het						62	ho
62	ho						64	ho
63	wt						65	ho
64	ho						66	ho
65	ho						68	ho
66	ho						72	ho
67	wt						74	ho
68	ho						78	ho
69	het						81	ho
70	het						82	ho
71	het						88	ho
72	ho						95	ho
73	wt					33	3	ho
74	ho						5	wt
75	wt						19	wt
76	wt						20	wt
77	wt						26	wt
78	ho						28	wt
79	het						29	wt
80	het						32	wt
81	ho						36	wt
82	ho						41	wt
83	het						47	wt
84	wt						51	wt
85	wt						52	wt
86	het						54	wt
87	het						63	wt
88	ho						67	wt
89	het						73	wt
90	het						75	wt
91	het						76	wt
92	het						77	wt
93	het						84	wt
94	wt						85	wt
95	ho					22	94	wt
96	het
						93

## Sheet: Stats Cartliage
Table Analyzed	C1							Table Analyzed	C2							Table Analyzed	C3							Table Analyzed	C4							Table Analyzed	C5				Table Analyzed	C6							Table Analyzed	C7
One-way analysis of variance								One-way analysis of variance								One-way analysis of variance								One-way analysis of variance								Kruskal-Wallis test					One-way analysis of variance								One-way analysis of variance
P value	0.1729							P value	0.4872							P value	0.3017							P value	0.9175							P value	0.7614				P value	0.5064							P value	0.0454
P value summary	ns							P value summary	ns							P value summary	ns							P value summary	ns							Exact or approximate P value?	Gaussian Approximation				P value summary	ns							P value summary	*
Are means signif. different? (P < 0.05)	No							Are means signif. different? (P < 0.05)	No							Are means signif. different? (P < 0.05)	No							Are means signif. different? (P < 0.05)	No							P value summary	ns				Are means signif. different? (P < 0.05)	No							Are means signif. different? (P < 0.05)	Yes
Number of groups	3							Number of groups	3							Number of groups	3							Number of groups	3							Do the medians vary signif. (P < 0.05)	No				Number of groups	3							Number of groups	3
F	1.801							F	0.7268							F	1.22							F	0.08619							Number of groups	3				F	0.6873							F	3.238
R square	0.05032							R square	0.02093							R square	0.03463							R square	0.002529							Kruskal-Wallis statistic	0.5453				R square	0.01982							R square	0.08695
Bartlett's test for equal variances								Bartlett's test for equal variances								Bartlett's test for equal variances								Bartlett's test for equal variances								Dunn's Multiple Comparison Test	Difference in rank sum	Significant? P < 0,05?	Summary		Bartlett's test for equal variances								Bartlett's test for equal variances
Bartlett's statistic (corrected)	0.6612							Bartlett's statistic (corrected)	1.32							Bartlett's statistic (corrected)	0.8589							Bartlett's statistic (corrected)	0.1751							wt vs het	-4.516	No	ns		Bartlett's statistic (corrected)	0.5783							Bartlett's statistic (corrected)	6.544
P value	0.7185							P value	0.5169							P value	0.6509							P value	0.9162							wt vs ho	-3.811	No	ns		P value	0.7489							P value	0.0379
P value summary	ns							P value summary	ns							P value summary	ns							P value summary	ns							het vs ho	0.7047	No	ns		P value summary	ns							P value summary	*
Do the variances differ signif. (P < 0.05)	No							Do the variances differ signif. (P < 0.05)	No							Do the variances differ signif. (P < 0.05)	No							Do the variances differ signif. (P < 0.05)	No												Do the variances differ signif. (P < 0.05)	No							Do the variances differ signif. (P < 0.05)	Yes
ANOVA Table	SS	df	MS					ANOVA Table	SS	df	MS					ANOVA Table	SS	df	MS					ANOVA Table	SS	df	MS										ANOVA Table	SS	df	MS					ANOVA Table	SS	df	MS
Treatment (between columns)	2175	2	1087					Treatment (between columns)	322.9	2	161.4					Treatment (between columns)	824.8	2	412.4					Treatment (between columns)	46.62	2	23.31										Treatment (between columns)	70.61	2	35.31					Treatment (between columns)	356.6	2	178.3
Residual (within columns)	41046	68	603.6					Residual (within columns)	15104	68	222.1					Residual (within columns)	22995	68	338.2					Residual (within columns)	18389	68	270.4										Residual (within columns)	3493	68	51.37					Residual (within columns)	3745	68	55.07
Total	43221	70						Total	15427	70						Total	23820	70						Total	18436	70											Total	3563	70						Total	4101	70
Tukey's Multiple Comparison Test	Mean Diff,	q	Significant? P < 0,05?	Summary	95% CI of diff			Tukey's Multiple Comparison Test	Mean Diff,	q	Significant? P < 0,05?	Summary	95% CI of diff			Tukey's Multiple Comparison Test	Mean Diff,	q	Significant? P < 0,05?	Summary	95% CI of diff			Tukey's Multiple Comparison Test	Mean Diff,	q	Significant? P < 0,05?	Summary	95% CI of diff								Tukey's Multiple Comparison Test	Mean Diff,	q	Significant? P < 0,05?	Summary	95% CI of diff			Tukey's Multiple Comparison Test	Mean Diff,	q	Significant? P < 0,05?	Summary
wt vs het	-14.34	2.684	No	ns	-32,46 to 3,787			wt vs het	-5.513	1.701	No	ns	-16,51 to 5,482			wt vs het	-8.825	2.207	No	ns	-22,39 to 4,741			wt vs het	1.588	0.444	No	ns	-10,54 to 13,72								wt vs het	-2.347	1.506	No	ns	-7,635 to 2,940			wt vs het	-3.188	1.976	No	ns
wt vs ho	-8.869	1.637	No	ns	-27,26 to 9,518			wt vs ho	-3.139	0.955	No	ns	-14,29 to 8,015			wt vs ho	-5.73	1.413	No	ns	-19,49 to 8,032			wt vs ho	-0.1127	0.03107	No	ns	-12,42 to 12,19								wt vs ho	-2.326	1.471	No	ns	-7,689 to 3,038			wt vs ho	1.904	1.163	No	ns
het vs ho	5.469	1.156	No	ns	-10,59 to 21,52			het vs ho	2.374	0.8271	No	ns	-7,365 to 12,11			het vs ho	3.095	0.874	No	ns	-8,922 to 15,11			het vs ho	-1.7	0.5369	No	ns	-12,45 to 9,046								het vs ho	0.02171	0.01573	No	ns	-4,662 to 4,705			het vs ho	5.092	3.563	Yes	*
D'Agostino & Pearson omnibus normality test								D'Agostino & Pearson omnibus normality test								D'Agostino & Pearson omnibus normality test																					D'Agostino & Pearson omnibus normality test								D'Agostino & Pearson omnibus normality test
K2	0.8318	3.483	1.589					K2	1.221	1.25	0.9438					K2	2.303	4.476	2.871					D'Agostino & Pearson omnibus normality test								D'Agostino & Pearson omnibus normality test					K2	0.8171	1.938	0.6243					K2	2.121	2.194	0.1411
P value	0.6598	0.1752	0.4518					P value	0.5432	0.5352	0.6238					P value	0.3161	0.1067	0.238					K2	0.2282	5.67	0.2852					K2	6.601	13.15	0.9103		P value	0.6646	0.3795	0.7319					P value	0.3464	0.3338	0.9319
Passed normality test (alpha=0.05)?	Yes	Yes	Yes					Passed normality test (alpha=0.05)?	Yes	Yes	Yes					Passed normality test (alpha=0.05)?	Yes	Yes	Yes					P value	0.8922	0.0587	0.8671					P value	0.0369	0.0014	0.6344		Passed normality test (alpha=0.05)?	Yes	Yes	Yes					Passed normality test (alpha=0.05)?	Yes	Yes	Yes
P value summary	ns	ns	ns					P value summary	ns	ns	ns					P value summary	ns	ns	ns					Passed normality test (alpha=0.05)?	Yes	Yes	Yes					Passed normality test (alpha=0.05)?	No	No	Yes		P value summary	ns	ns	ns					P value summary	ns	ns	ns
																								P value summary	ns	ns	ns					P value summary	*	**	ns
Sum	5418	9325	8517					Sum	1582	2761	2502					Sum	3836	6565	6016																		Sum	1822	3067	2847					Sum	1872	3172	2813
																								Sum	2044	3322	3129					Sum	2763	4670	4345
[truncated: 7 more columns]

## Sheet: Stats bone
Table Analyzed	B8 Branch1		Table Analyzed	B9 Entopt
Chi-square			Chi-square
Chi-square, df	2,444, 2		Chi-square, df	9,102, 2
P value	0.2946		P value	0.0106
P value summary	ns		P value summary	*
One- or two-sided	NA		One- or two-sided	NA
Statistically significant? (alpha<0.05)	No		Statistically significant? (alpha<0.05)	Yes
Data analyzed			Data analyzed
Number of rows	2		Number of rows	2
Number of columns	3		Number of columns	3
