# Supplementary material for: Targeting fibroblast growth factor receptors causes severe craniofacial malformations in zebrafish larvae
Source: PeerJ. 2022 Nov 23;10:e14338. doi: 10.7717/peerj.14338 (PMC9700454; doi:10.7717/peerj.14338)
Supplement: Supplemental Information 2 [file peerj-10-14338-s002.xlsx]

## Sheet: RNA's
total (trizol) RNA, fgf8r2 embryos, 5dpf (1 embryo/tube), cDNA synthesis & Ct values												300 ng
				phenotype	genotyping			RNA	nanodrop			for cDNA synthesis			Ct	Ct	Ct	Ct	Ct	Ct	Ct	Ct	Ct	Ct	Ct	Ct	Ct	Ct	Ct	Ct	Ct	Ct	Ct		for CFX manager
					fwRsa/revQ-PCR	RNA prep.	H2O	conc.				RNA	H2O		elf1a	rpl13	osx	col1a1a	runx2a	runx2b	col2a1	dlx2	nkx3.2	col9a1a	col9a1b	fgfr2	col1a2	fgf8a	fgfr1a	fgfr1b	fgfr3	fgfr4	fgf3
sample	zebrafish		#	fgfr2	group	Date	µl (ca)	ng/ul	260/280	260/230		µl	µl		80	83	60	207	236	237	238	239	240	221	222	274	16	255	276	277	278	279	280		sample	group
1	embryo	5 dpf	1		Het	2018-08-20	10	77.35	1.95	0.86		3.87847	4.12153		15.74	17.92	26.77	17.8	27.12	25.32	19.32	23.38	26.24	22.04	26.17	22.53	19.43	26.23	24.08	25.5	27.32	22.87	26.19		01	Het
2	embryo	5 dpf	1		Het	2018-08-20	10	81.19	1.87	1.88		3.69504	4.30496		16.01	18.06	27.12	17.13	27.1	25.02	19.04	23.45	26.12	22	26.29	22.26	19.18	26.08	24.26	25.3	27.04	22.88	26.29		02	Het
3	embryo	5 dpf	1		Wt	2018-08-20	10	63.89	1.87	2.30		4.69557	3.30443		16.03	17.77	27.02	17.67	28.13	25.59	18.87	23.68	26.3	22.01	25.46	21.69	19.45	26.49	24.26	25.44	27.01	23.1	26.09		03	Wt
4	embryo	5 dpf	1		Mut	2018-08-20	10	64.25	2.07	0.18		4.66926	3.33074		15.83	17.9	27.01	17.75	27.19	25.16	18.82	23.24	25.97	21.8	25.43	23.51	19.26	26.36	24.36	25.16	27.31	23.12	26.18		04	Mut
4	embryo	5 dpf	1		Mut	2018-08-20	10	68.37	1.85	2.31		4.38789	3.61211		16.37	18.45	28.31	19.79	28.69	26.34	20.58	24.64	26.95	23.34	26.15	25.23	21.16	27.89	25.32	25.51	28.48	23.06	26.88		05	Mut
5	embryo	5 dpf	1		Mut	2018-08-20	10	80.08	1.99	0.64		3.74625	4.25375		15.99	17.99	28.09	18.71	28.1	26.23	20.01	24.1	26.28	22.47	26.74	23.74	20.43	26.32	24.88	25.64	27.82	22.77	26.2		06	Mut
7	embryo	5 dpf	1		Mut	2018-08-20	10	116.12	1.95	1.23		2.58353	5.41647		16.14	18.09	27.39	17.98	27.58	25.82	19.03	23.29	26.56	22.07	24.62	24.12	19.73	26.53	24.89	26.72	27.27	23.25	26.18		07	Mut
8	embryo	5 dpf	1		Mut	2018-08-20	10	78.87	2.13	0.18		3.80373	4.19627		16.66	18.83	28.33	18.52	28.44	26.33	19.86	24.4	26.78	23.15	25.83	24.3	20.11	26.91	25.92	27.26	28.2	23.71	27.14		08	Mut
9	embryo	5 dpf	1		Het	2018-08-20	10	80.01	1.96	0.97		3.74953	4.25047		16.27	18.19	27.17	17.54	28.2	25.35	18.76	23.41	26.71	21.86	24.63	22.54	19.58	26.74	24.13	25.94	27.53	23.44	26.49		09	Het
10	embryo	5 dpf	1		Mut	2018-08-20	10	88.75	1.95	1.20		3.38028	4.61972		16.47	18.26	27.78	17.7	29.43	26.05	18.73	24.2	26.32	22.24	26.21	24.1	20.01	27.02	25.22	26.34	27.78	24.02	27.19		10	Mut
11	embryo	5 dpf	1		Wt	2018-08-20	10	149.06	1.89	1.78		2.01261	5.98739		18.95	21.5	29.6	20.54	31.37	28.73	23.42	26.67	29.09	25.55	29.13	25.24	22.7	29.43	28.15	30.48	31.36	27.21	29.04		11	Wt
12	embryo	5 dpf	1		Het	2018-08-20	10	106.41	1.83	2.19		2.81928	5.18072		16.34	18.5	27.43	18.23	28.1	25.42	19.05	23.37	26.2	22.25	26.55	22.69	19.97	27.06	24.75	25.8	27.37	23.81	26.83		12	Het
13	embryo	5 dpf	1		Het	2018-08-20	10	59.97	1.96	0.36		5.0025	2.9975		15.61	17.4	27.61	17.82	28.18	25.66	19.93	24.12	26.66	23.74	23.52	22.46	19.25	26.65	24.73	25.54	27.08	23.32	26.32		13	Het
14	embryo	5 dpf	1		Het	2018-08-20	10	63.2	1.89	0.91		4.74684	3.25316		16.59	18.25	28.27	18.62	29.18	26.66	20.46	24.07	26.46	23.52	27.28	23.15	20.31	27.4	26.14	26.39	28.08	24.17	27.46		14	Het
15	embryo	5 dpf	1		Het	2018-08-20	10	53.02	1.87	1.81		5.65824	2.34176		16.01	18.01	27.2	17.25	28.1	25.49	18.88	23.54	26.08	22.17	24.61	22.5	19.5	26.78	25.21	26.13	27.35	23.22	26.28		15	Het
16	embryo	5 dpf	1		Het	2018-08-20	10	88.56	1.80	2.13		3.38753	4.61247		16.42	18.57	27.64	19.24	28.28	25.72	19.34	23.6	26.81	22.94	27.88	23.15	20.88	27.67	25.63	26.79	27.62	24.05	26.49		16	Het
17	embryo	5 dpf	1		Het	2018-08-20	10	89.9	1.95	0.76		3.33704	4.66296		16.13	18.31	27.37	17.82	27.66	25.78	18.69	23.41	26.32	22.13	25.41	22.89	19.36	27.13	25.33	25.64	26.58	23.34	27		17	Het
18	embryo	5 dpf	1		-	2018-08-20	10	62.33	1.83	1.85		4.81309	3.18691		17.23	18.96	28.39	18.51	28.52	25.85	19.43	24.36	27.44	22.8	27.14	23.29	20.52	27.2	26.01	25.77	26.93	24.1	27.43		18
19	embryo	5 dpf	1		Wt	2018-08-20	10	69.13	1.84	1.75		4.33965	3.66035		16.07	18.22	27.09	17.37	27.14	25.46	18.6	23.56	26.28	22.06	26.18	21.84	19.44	26.59	25.07	26.03	26.31	23.11	26.53		19	Wt
20	embryo	5 dpf	1		Wt	2018-08-20	10	74.59	1.88	1.09		4.02199	3.97801		16.29	18.46	27.3	18.17	27.19	25.29	18.87	24.01	25.72	22.24	24.84	22	19.33	26.3	25.09	25.45	27.19	23.59	26.51		20	Wt
21	embryo	5 dpf	1		Het	2018-08-20	10	138.99	1.80	1.88		2.15843	5.84157		16.14	18.71	27.96	18.2	27.27	26.24	19.85	24.18	26.77	22.45	27.11	22.82	19.92	27.12	25.44	26.02	26.72	23.89	27.21		21	Het
22	embryo	5 dpf	1		Mut	2018-08-20	10	98.51	1.93	1.31		3.04538	4.95462		15.84	17.7	27.13	17.58	27.56	25.57	18.73	23.18	26.06	21.89	26.24	23.75	19.12	26.39	25.04	25.44	26.66	23.03	26.43		22	Mut
23	embryo	5 dpf	1		Het	2018-08-20	10	91.1	1.81	1.97		3.29308	4.70692		16.34	18.01	27.7	17.5	28.59	26.54	20.02	23.88	26.38	22.78	25.29	23.24	19.35	26.58	25.78	26.33	27.52	23.72	26.89		23	Het
24	embryo	5 dpf	1		Wt	2018-08-20	10	108.03	1.82	2.19		2.77701	5.22299		16.27	18.29	27.4	17.41	27.91	25.93	19.04	23.35	26.34	22.08	24.82	22.14	19.34	27.01	25.31	25.63	26.92	23.45	26.59		24	Wt
25	embryo	5 dpf	1		Wt	2018-08-20	10	61.67	1.83	2.13		4.8646	3.1354		16.66	18.66	28.46	18.82	29.34	27.01	19.61	25.4	27.11	22.95	26.05	22.7	20.1	27.13	25.51	26.32	27.51	24.22	27.38		25	Wt
26	embryo	5 dpf	1		Mut	2018-08-20	10	74.07	1.86	2.30		4.05022	3.94978		17.41	19.65	28.39	20.27	27.98	26.19	20.35	24.3	27.49	23.62	25.71	25.05	21.36	27.57	25.43	26.43	28.02	24.56	28.31		26	Mut
27	embryo	5 dpf	1		Het	2018-08-20	10	69.74	1.99	0.32		4.30169	3.69831		17.2	19.12	28.64	19.58	28.31	27.07	19.6	24.58	27.51	23.4	27.03	24.14	20.82	27.68	25.62	26.55	28.13	24.58	28.14		27	Het
28	embryo	5 dpf	1		Mut	2018-08-20	10	65.56	1.96	0.83		4.57596	3.42404		17.41	19.33	28.83	19.57	28.76	26.95	20.4	25.41	27.64	23.82	27.01	25.17	21.23	27.93	25.95	27.23	28.52	25.29	28.99		28	Mut
29	embryo	5 dpf	1		Het	2018-08-20	10	58.99	1.97	1.47		5.08561	2.91439		15.44	17.56	27.08	17.15	27.28	25.17	18.38	23.06	25.41	21.51	25.82	22.15	18.71	25.96	23.34	25.1	26.22	22.47	25.9		29	Het
30	embryo	5 dpf	1		Het	2018-08-20	10	51.91	1.99	0.23		5.77923	2.22077		15.63	17.71	27.32	17.69	28.18	25.95	19.17	23.32	26.06	22.32	23.83	22.4	19.14	26.15	23.98	25.34	26.82	23.08	26.43		30	Het
31	embryo	5 dpf	1		Wt	2018-08-20	10	85.38	1.92	1.46		3.5137	4.4863		16.24	18.36	27.25	18.08	27.31	25.39	19.38	24.16	26.58	22.4	25.26	22.61	19.59	27	24.06	25.83	27.21	24.01	27.14		31	Wt
32	embryo	5 dpf	1		Mut	2018-08-20	10	27.14	2.05	0.09		8	-		17.72	19.86	29.01	20.41	28.48	26.76	21.19	25.32	27.93	24.49	25.5	25.43	21.55	27.73	26.33	27.26	28.47	25.01	28.18		32	Mut
33	embryo	5 dpf	1		Wt	2018-08-20	10	84.27	1.84	1.88		3.55999	4.44001		16.52	18.26	27.83	18.57	28.45	26.4	19.56	24.57	26.59	22.71	26.12	22.78	19.99	27.11	25.58	26.47	27.45	23.89	27.05		33	Wt
34	embryo	5 dpf	1			2018-08-20	10	48.62	1.89	1.59		6.1703	1.8297	out?	21.52	23.42	32.87	24.71	35.57	33	27	30.32	30.65	27.94	31.85	30.34	26.16	30.95	32.59	34.21	34.59	29.96	31.65		34
35	embryo	5 dpf	1		Mut	2018-08-20	10	79.77	1.94	0.94		3.76081	4.23919		17.39	19.72	27.64	18.89	28.38	26.25	20.29	24.12	27.29	23.97	26.96	25	21.11	27.76	26.21	27.48	28.7	24.63	27.97		35	Mut
36	embryo	5 dpf	1		Wt	2018-08-20	10	91.7	1.97	0.65		3.27154	4.72846		16.3	18.47	27.87	19.1	28.91	26.1	20.54	25.44	25.91	23.45	25.16	22.62	20.23	27.36	25.18	26.79	27.44	24.25	27.77		36	Wt
37	embryo	5 dpf	1		-	2018-08-20	10	63.35	2.00	0.28		4.7356	3.2644		15.52	17.66	27.27	18.21	27.9	25.49	19.35	23.52	25.87	22.58	23.38	23.76	19.59	26.05	24.73	25.68	26.48	23.05	26.4		37
38	embryo	5 dpf	1		Wt	2018-08-20	10	67.13	1.99	0.46		4.46894	3.53106		16.02	18.03	26.73	17.24	27.55	25.13	18.85	23.5	25.57	22.03	26.29	21.86	19.08	26.29	24.87	26.34	26.32	23.47	26.23		38	Wt
39	embryo	5 dpf	1		-	2018-08-20	10	76.27	1.92	1.17		3.93339	4.06661		15.96	17.99	27.03	17.37	27.64	25.31	18.78	23.48	25.89	22.09	25.23	21.66	19.21	26.14	25.16	26.46	26.47	23.09	26.14		39
40	embryo	5 dpf	1		Wt	2018-08-20	10	87.95	1.98	1.55		3.41103	4.58897		16.02	18.13	27.08	17.86	27.58	25.63	19.37	24.08	26.43	22.53	25.42	22.14	19.49	26.49	26.01	27.05	27.55	23.23	26.1		40	Wt
41	embryo	5 dpf	1		Wt	2018-08-20	10	46.26	1.85	1.95		6.48508	1.51492		16.2	18.05	27.31	17.74	27.59	26.52	20.13	23.79	26.15	22.67	26.07	21.95	19.09	26.62	24.41	26.88	27.18	23.5	26.16		41	Wt
42	embryo	5 dpf	1		Het	2018-08-20	10	57.62	1.93	0.45		5.20653	2.79347		17.01	18.61	28.04	18.02	28.54	26.36	19.37	24.24	26.51	22.64	25.68	23.01	19.64	27.55	25.07	27.37	27.63	24.21	27.1		42	Het
43	embryo	5 dpf	1		Het	2018-08-20	10	81.05	1.90	0.79		3.70142	4.29858		16.04	18.27	27.4	17.56	28.12	26.22	19.58	23.76	26.36	23.25	23.1	23.02	19.24	26.5	24.23	27.1	27.35	23.59	26.29		43	Het
44	embryo	5 dpf	1		Wt	2018-08-20	10	49.62	2.05	0.20		6.04595	1.95405		15.57	17.44	27.03	17.16	27.56	26.13	19.41	23.16	25.91	22.83	26.08	21.81	19.09	26.02	24.14	26.32	27.06	23.17	25.92		44	Wt
45	embryo	5 dpf	1		Het	2018-08-20	10	46.75	1.89	1.18		6.41711	1.58289		16.02	17.77	27.09	17.56	27.75	25.88	19.59	23.59	26.16	22.88	27.05	22.48	19.24	26.41	24.37	26.36	26.96	23.21	26.43		45	Het
46	embryo	5 dpf	1		Wt	2018-08-20	10	42.66	2.03	0.19		7.03235	0.967651		16.04	17.64	27.04	17.42	28.03	26.06	19.14	23.07	26.11	22.4	26.23	21.7	18.77	26.19	24.17	26.61	26.67	23.27	25.95		46	Wt
47	embryo	5 dpf	1		Mut	2018-08-20	10	78.2	2.00	0.77		3.83632	4.16368		16	17.77	27.31	17.99	27.8	25.91	19.26	23.5	25.86	22.59	26.26	24	19.54	26.47	24.63	26.92	27.08	23.96	25.88		47	Mut
48	embryo	5 dpf	1		Het	2018-08-20	10	71.85	1.92	1.01		4.17537	3.82463		16.96	18.76	28.09	18.46	28.76	26.84	20.17	24.22	26.65	23.27	25.64	23.09	19.69	27.66	25.93	27.58	27.32	24.69	27.04		48	Het
																																			Mut	12
																																			Het	18
																																			Wt	14

## Sheet: plate setup
	plate setup															primer combination
		1	2	3	4	5	6	7	8	9	10	11	12
	A	1	9	17	25	33	41									1	elf1a	rpl13		9	fgfr3	fgfr4
	B	2	10	18	26	34	42									2	osx	col1a1a		10	fgf3
	C	3	11	19	27	35	43									3	runx2a	runx2b
	D	4	12	20	28	36	44									4	col2a1	dlx2
	E	5	13	21	29	37	45									5	nkx3.2	col9a1a
	F	6	14	22	30	38	46									6	col9a1b	fgfr2
	G	7	15	23	31	39	47									7	col1a2	fgfr2
	H	8	16	24	32	40	48									8	fgfr1a	fgfr1b
	RNA (µl)														H2O (µl)
		1	2	3	4	5	6	7	8	9	10	11	12			1	2	3	4	5	6	7	8	9	10	11	12
	A	3.87847	3.74953	3.33704	4.8646	3.55999	6.48508								A	4.12153	4.25047	4.66296	3.1354	4.44001	1.51492
	B	3.69504	3.38028	4.81309	4.05022	6.1703	5.20653								B	4.30496	4.61972	3.18691	3.94978	1.8297	2.79347
	C	4.69557	2.01261	4.33965	4.30169	3.76081	3.70142								C	3.30443	5.98739	3.66035	3.69831	4.23919	4.29858
	D	4.66926	2.81928	4.02199	4.57596	3.27154	6.04595								D	3.33074	5.18072	3.97801	3.42404	4.72846	1.95405
	E	4.38789	5.0025	2.15843	5.08561	4.7356	6.41711								E	3.61211	2.9975	5.84157	2.91439	3.2644	1.58289
	F	3.74625	4.74684	3.04538	5.77923	4.46894	7.03235								F	4.25375	3.25316	4.95462	2.22077	3.53106	0.967651
	G	2.58353	5.65824	3.29308	3.5137	3.93339	3.83632								G	5.41647	2.34176	4.70692	4.4863	4.06661	4.16368
	H	3.80373	3.38753	2.77701	8	3.41103	4.17537								H	4.19627	4.61247	5.22299	-	4.58897	3.82463

## Sheet: genestudy individual
relative, normalized expression (individual)																							Target	Coefficient Variance	M Value
											Ct	Ct											elf1a 80	0.0771	0.2197
	genotype										elf1a	rpl13											rpl13 83	0.0755	0.2197
sample		Target	Sample	Ctrl	Expression	Expression SEM	Corrected Expression SEM	Mean Cq	Cq SEM		80	83		Target	Sample	Ctrl	Expression	Expression SEM	Corrected Expression SEM	Mean Cq	Cq SEM
1	Het	col1a1 207	1		0.83561	0	0	17.8	0		15.74	17.92		col1a2 16	1		0.80026	0	0	19.43	0
2	Het	col1a1 207	2		1.52624	0	0	17.13	0		16.01	18.06		col1a2 16	2		1.09771	0	0	19.18	0
3	Wt	col1a1 207	3		0.95312	0	0	17.67	0		16.03	17.77		col1a2 16	3		0.82928	0	0	19.45	0
4	Mut	col1a1 207	4		0.8837	0	0	17.75	0		15.83	17.9		col1a2 16	4		0.92061	0	0	19.26	0
5	Mut	col1a1 207	5		0.31375	0	0	19.79	0		16.37	18.45		col1a2 16	5		0.36197	0	0	21.16	0
6	Mut	col1a1 207	6		0.49709	0	0	18.71	0		15.99	17.99		col1a2 16	6		0.44975	0	0	20.43	0
7	Mut	col1a1 207	7		0.89711	0	0	17.98	0		16.14	18.09		col1a2 16	7		0.79215	0	0	19.73	0
8	Mut	col1a1 207	8		0.95529	0	0	18.52	0		16.66	18.83		col1a2 16	8		0.94226	0	0	20.11	0
9	Het	col1a1 207	9		1.31247	0	0	17.54	0		16.27	18.19		col1a2 16	9		0.95109	0	0	19.58	0
10	Mut	col1a1 207	10		1.28849	0	0	17.7	0		16.47	18.26		col1a2 16	10		0.77852	0	0	20.01	0
11	Wt	col1a1 207	11		1.31319	0	0	20.54	0		18.95	21.5		col1a2 16	11		0.8769	0	0	22.7	0
12	Het	col1a1 207	12		0.92814	0	0	18.23	0		16.34	18.5		col1a2 16	12		0.83306	0	0	19.97	0
13	Het	col1a1 207	13		0.65692	0	0	17.82	0		15.61	17.4		col1a2 16	13		0.72454	0	0	19.25	0
14	Het	col1a1 207	14		0.71196	0	0	18.62	0		16.59	18.25		col1a2 16	14		0.65517	0	0	20.31	0
15	Het	col1a1 207	15		1.37622	0	0	17.25	0		16.01	18.01		col1a2 16	15		0.86481	0	0	19.5	0
16	Het	col1a1 207	16		0.48914	0	0	19.24	0		16.42	18.57		col1a2 16	16		0.46637	0	0	20.88	0
17	Het	col1a1 207	17		1.07495	0	0	17.82	0		16.13	18.31		col1a2 16	17		1.10574	0	0	19.36	0
18		col1a1 207	18		1.22269	0	0	18.51	0		17.23	18.96		col1a2 16	18		0.90423	0	0	20.52	0
19	Wt	col1a1 207	19		1.39721	0	0	17.37	0		16.07	18.22		col1a2 16	19		0.98893	0	0	19.44	0
20	Wt	col1a1 207	20		0.93821	0	0	18.17	0		16.29	18.46		col1a2 16	20		1.25075	0	0	19.33	0
21	Het	col1a1 207	21		0.95535	0	0	18.2	0		16.14	18.71		col1a2 16	21		0.86583	0	0	19.92	0
22	Mut	col1a1 207	22		0.92722	0	0	17.58	0		15.84	17.7		col1a2 16	22		0.95099	0	0	19.12	0
23	Het	col1a1 207	23		1.30522	0	0	17.5	0		16.34	18.01		col1a2 16	23		1.07487	0	0	19.35	0
24	Wt	col1a1 207	24		1.49072	0	0	17.41	0		16.27	18.29		col1a2 16	24		1.16813	0	0	19.34	0
25	Wt	col1a1 207	25		0.73039	0	0	18.82	0		16.66	18.66		col1a2 16	25		0.89686	0	0	20.1	0
26	Mut	col1a1 207	26		0.48804	0	0	20.27	0		17.41	19.65		col1a2 16	26		0.68192	0	0	21.36	0
27	Het	col1a1 207	27		0.61054	0	0	19.58	0		17.2	19.12		col1a2 16	27		0.76813	0	0	20.82	0
28	Mut	col1a1 207	28		0.7073	0	0	19.57	0		17.41	19.33		col1a2 16	28		0.66995	0	0	21.23	0
29	Het	col1a1 207	29		1.0427	0	0	17.15	0		15.44	17.56		col1a2 16	29		1.05589	0	0	18.71	0
30	Het	col1a1 207	30		0.80192	0	0	17.69	0		15.63	17.71		col1a2 16	30		0.87465	0	0	19.14	0
31	Wt	col1a1 207	31		0.94576	0	0	18.08	0		16.24	18.36		col1a2 16	31		0.99178	0	0	19.59	0
32	Mut	col1a1 207	32		0.53244	0	0	20.41	0		17.72	19.86		col1a2 16	32		0.71743	0	0	21.55	0
33	Wt	col1a1 207	33		0.71933	0	0	18.57	0		16.52	18.26		col1a2 16	33		0.80348	0	0	19.99	0
34		col1a1 207	34		0.34633	0	0	24.71	0		21.52	23.42		col1a2 16	34		0.37662	0	0	26.16	0
35	Mut	col1a1 207	35		1.29184	0	0	18.89	0		17.39	19.72		col1a2 16	35		0.82738	0	0	21.11	0
36	Wt	col1a1 207	36		0.49721	0	0	19.1	0		16.3	18.47		col1a2 16	36		0.67582	0	0	20.23	0
37		col1a1 207	37		0.53012	0	0	18.21	0		15.52	17.66		col1a2 16	37		0.60985	0	0	19.59	0
38	Wt	col1a1 207	38		1.40881	0	0	17.24	0		16.02	18.03		col1a2 16	38		1.17438	0	0	19.08	0
39		col1a1 207	39		1.24554	0	0	17.37	0		15.96	17.99		col1a2 16	39		1.03317	0	0	19.21	0
40	Wt	col1a1 207	40		0.94312	0	0	17.86	0		16.02	18.13		col1a2 16	40		0.90849	0	0	19.49	0
41	Wt	col1a1 207	41		1.06569	0	0	17.74	0		16.2	18.05		col1a2 16	41		1.24597	0	0	19.09	0
42	Het	col1a1 207	42		1.40599	0	0	18.02	0		17.01	18.61		col1a2 16	42		1.37057	0	0	19.64	0
43	Het	col1a1 207	43		1.2281	0	0	17.56	0		16.04	18.27		col1a2 16	43		1.14497	0	0	19.24	0
44	Wt	col1a1 207	44		1.03392	0	0	17.16	0		15.57	17.44		col1a2 16	44		0.81057	0	0	19.09	0
45	Het	col1a1 207	45		1.02715	0	0	17.56	0		16.02	17.77		col1a2 16	45		0.95487	0	0	19.24	0
46	Wt	col1a1 207	46		1.0925	0	0	17.42	0		16.04	17.64		col1a2 16	46		1.27533	0	0	18.77	0
47	Mut	col1a1 207	47		0.76154	0	0	17.99	0		16	17.77		col1a2 16	47		0.77482	0	0	19.54	0
48	Het	col1a1 207	48		1.08277	0	0	18.46	0		16.96	18.76		col1a2 16	48		1.37055	0	0	19.69	0
1	Het	col2a1 238	1		0.6926	0	0	19.32	0		15.74	17.92		col9a1a 221	1		0.91846	0	0	22.04	0
2	Het	col2a1 238	2		0.97049	0	0	19.04	0		16.01	18.06		col9a1a 221	2		1.0857	0	0	22	0
3	Wt	col2a1 238	3		0.99096	0	0	18.87	0		16.03	17.77		col9a1a 221	3		0.98509	0	0	22.01	0
4	Mut	col2a1 238	4		0.99974	0	0	18.82	0		15.83	17.9		col9a1a 221	4		1.11207	0	0	21.8	0
5	Mut	col2a1 238	5		0.43119	0	0	20.58	0		16.37	18.45		col9a1a 221	5		0.55881	0	0	23.34	0
6	Mut	col2a1 238	6		0.48005	0	0	20.01	0		15.99	17.99		col9a1a 221	6		0.76088	0	0	22.47	0
7	Mut	col2a1 238	7		1.02889	0	0	19.03	0		16.14	18.09		col9a1a 221	7		1.09428	0	0	22.07	0
8	Mut	col2a1 238	8		0.89584	0	0	19.86	0		16.66	18.83		col9a1a 221	8		0.8045	0	0	23.15	0
9	Het	col2a1 238	9		1.34868	0	0	18.76	0		16.27	18.19		col9a1a 221	9		1.37654	0	0	21.86	0
10	Mut	col2a1 238	10		1.50242	0	0	18.73	0		16.47	18.26		col9a1a 221	10		1.15459	0	0	22.24	0
11	Wt	col2a1 238	11		0.42419	0	0	23.42	0		18.95	21.5		col9a1a 221	11		0.85066	0	0	25.55	0
12	Het	col2a1 238	12		1.25628	0	0	19.05	0		16.34	18.5		col9a1a 221	12		1.19378	0	0	22.25	0
13	Het	col2a1 238	13		0.36327	0	0	19.93	0		15.61	17.4		col9a1a 221	13		0.22593	0	0	23.74	0
14	Het	col2a1 238	14		0.4714	0	0	20.46	0		16.59	18.25		col9a1a 221	14		0.49546	0	0	23.52	0
15	Het	col2a1 238	15		1.06468	0	0	18.88	0		16.01	18.01		col9a1a 221	15		0.94773	0	0	22.17	0
16	Het	col2a1 238	16		1.08203	0	0	19.34	0		16.42	18.57		col9a1a 221	16		0.78483	0	0	22.94	0
17	Het	col2a1 238	17		1.3981	0	0	18.69	0		16.13	18.31		col9a1a 221	17		1.13429	0	0	22.13	0
18		col2a1 238	18		1.53917	0	0	19.43	0		17.23	18.96		col9a1a 221	18		1.30141	0	0	22.8	0
19	Wt	col2a1 238	19		1.41825	0	0	18.6	0		16.07	18.22		col9a1a 221	19		1.12967	0	0	22.06	0
20	Wt	col2a1 238	20		1.37946	0	0	18.87	0		16.29	18.46		col9a1a 221	20		1.1689	0	0	22.24	0
21	Het	col2a1 238	21		0.72614	0	0	19.85	0		16.14	18.71		col9a1a 221	21		1.05045	0	0	22.45	0
22	Mut	col2a1 238	22		0.99278	0	0	18.73	0		15.84	17.7		col9a1a 221	22		0.97488	0	0	21.89	0
23	Het	col2a1 238	23		0.54201	0	0	20.02	0		16.34	18.01		col9a1a 221	23		0.69689	0	0	22.78	0
24	Wt	col2a1 238	24		1.14508	0	0	19.04	0		16.27	18.29		col9a1a 221	24		1.21949	0	0	22.08	0
25	Wt	col2a1 238	25		1.01076	0	0	19.61	0		16.66	18.66		col9a1a 221	25		0.8698	0	0	22.95	0
26	Mut	col2a1 238	26		1.0953	0	0	20.35	0		17.41	19.65		col9a1a 221	26		0.99591	0	0	23.62	0
27	Het	col2a1 238	27		1.42696	0	0	19.6	0		17.2	19.12		col9a1a 221	27		0.90092	0	0	23.4	0
28	Mut	col2a1 238	28		0.94892	0	0	20.4	0		17.41	19.33		col9a1a 221	28		0.77625	0	0	23.82	0
29	Het	col2a1 238	29		1.05589	0	0	18.38	0		15.44	17.56		col9a1a 221	29		1.05589	0	0	21.51	0
30	Het	col2a1 238	30		0.68624	0	0	19.17	0		15.63	17.71		col9a1a 221	30		0.67873	0	0	22.32	0
31	Wt	col2a1 238	31		0.91894	0	0	19.38	0		16.24	18.36		col9a1a 221	31		0.99079	0	0	22.4	0
32	Mut	col2a1 238	32		0.73814	0	0	21.19	0		17.72	19.86		col9a1a 221	32		0.65662	0	0	24.49	0
33	Wt	col2a1 238	33		0.86109	0	0	19.56	0		16.52	18.26		col9a1a 221	33		0.85001	0	0	22.71	0
34		col2a1 238	34		0.168	0	0	27	0		21.52	23.42		col9a1a 221	34		0.76513	0	0	27.94	0
35	Mut	col2a1 238	35		1.16497	0	0	20.29	0		17.39	19.72		col9a1a 221	35		0.79624	0	0	23.97	0
36	Wt	col2a1 238	36		0.43506	0	0	20.54	0		16.3	18.47		col9a1a 221	36		0.51015	0	0	23.45	0
37		col2a1 238	37		0.57541	0	0	19.35	0		15.52	17.66		col9a1a 221	37		0.53473	0	0	22.58	0
38	Wt	col2a1 238	38		1.09815	0	0	18.85	0		16.02	18.03		col9a1a 221	38		1.06118	0	0	22.03	0
39		col2a1 238	39		1.1145	0	0	18.78	0		15.96	17.99		col9a1a 221	39		0.98517	0	0	22.09	0
40	Wt	col2a1 238	40		0.78799	0	0	19.37	0		16.02	18.13		col9a1a 221	40		0.77402	0	0	22.53	0
41	Wt	col2a1 238	41		0.48339	0	0	20.13	0		16.2	18.05		col9a1a 221	41		0.73054	0	0	22.67	0
42	Het	col2a1 238	42		1.32002	0	0	19.37	0		17.01	18.61		col9a1a 221	42		1.19914	0	0	22.64	0
43	Het	col2a1 238	43		0.72005	0	0	19.58	0		16.04	18.27		col9a1a 221	43		0.49607	0	0	23.25	0
44	Wt	col2a1 238	44		0.52011	0	0	19.41	0		15.57	17.44		col9a1a 221	44		0.42351	0	0	22.83	0
45	Het	col2a1 238	45		0.59739	0	0	19.59	0		16.02	17.77		col9a1a 221	45		0.53577	0	0	22.88	0
46	Wt	col2a1 238	46		0.7902	0	0	19.14	0		16.04	17.64		col9a1a 221	46		0.72282	0	0	22.4	0
47	Mut	col2a1 238	47		0.75297	0	0	19.26	0		16	17.77		col9a1a 221	47		0.65559	0	0	22.59	0
48	Het	col2a1 238	48		0.78656	0	0	20.17	0		16.96	18.76		col9a1a 221	48		0.80297	0	0	23.27	0
1	Het	col9a1b 222	1		0.15714	0	0	26.17	0		15.74	17.92		dlx3.2 239	1		1.06572	0	0	23.38	0
2	Het	col9a1b 222	2		0.16649	0	0	26.29	0		16.01	18.06		dlx3.2 239	2		1.16786	0	0	23.45	0
3	Wt	col9a1b 222	3		0.26931	0	0	25.46	0		16.03	17.77		dlx3.2 239	3		0.90788	0	0	23.68	0
4	Mut	col9a1b 222	4		0.26835	0	0	25.43	0		15.83	17.9		dlx3.2 239	4		1.19903	0	0	23.24	0
5	Mut	col9a1b 222	5		0.2383	0	0	26.15	0		16.37	18.45		dlx3.2 239	5		0.66595	0	0	24.64	0
6	Mut	col9a1b 222	6		0.11847	0	0	26.74	0		15.99	17.99		dlx3.2 239	6		0.71892	0	0	24.1	0
7	Mut	col9a1b 222	7		0.56052	0	0	24.62	0		16.14	18.09		dlx3.2 239	7		1.38268	0	0	23.29	0
8	Mut	col9a1b 222	8		0.37438	0	0	25.83	0		16.66	18.83		dlx3.2 239	8		0.98701	0	0	24.4	0
9	Het	col9a1b 222	9		0.60365	0	0	24.63	0		16.27	18.19		dlx3.2 239	9		1.37605	0	0	23.41	0
10	Mut	col9a1b 222	10		0.2212	0	0	26.21	0		16.47	18.26		dlx3.2 239	10		0.87119	0	0	24.2	0
11	Wt	col9a1b 222	11		0.21272	0	0	29.13	0		18.95	21.5		dlx3.2 239	11		1.1388	0	0	26.67	0
12	Het	col9a1b 222	12		0.18243	0	0	26.55	0		16.34	18.5		dlx3.2 239	12		1.61449	0	0	23.37	0
13	Het	col9a1b 222	13		0.78883	0	0	23.52	0		15.61	17.4		dlx3.2 239	13		0.5095	0	0	24.12	0
14	Het	col9a1b 222	14		0.10932	0	0	27.28	0		16.59	18.25		dlx3.2 239	14		0.9889	0	0	24.07	0
15	Het	col9a1b 222	15		0.52582	0	0	24.61	0		16.01	18.01		dlx3.2 239	15		1.07619	0	0	23.54	0
16	Het	col9a1b 222	16		0.07628	0	0	27.88	0		16.42	18.57		dlx3.2 239	16		1.4512	0	0	23.6	0
17	Het	col9a1b 222	17		0.3496	0	0	25.41	0		16.13	18.31		dlx3.2 239	17		1.36538	0	0	23.41	0
18		col9a1b 222	18		0.19273	0	0	27.14	0		17.23	18.96		dlx3.2 239	18		1.29315	0	0	24.36	0
19	Wt	col9a1b 222	19		0.19431	0	0	26.18	0		16.07	18.22		dlx3.2 239	19		1.166	0	0	23.56	0
20	Wt	col9a1b 222	20		0.57502	0	0	24.84	0		16.29	18.46		dlx3.2 239	20		1.0005	0	0	24.01	0
21	Het	col9a1b 222	21		0.12424	0	0	27.11	0		16.14	18.71		dlx3.2 239	21		0.92327	0	0	24.18	0
22	Mut	col9a1b 222	22		0.14341	0	0	26.24	0		15.84	17.7		dlx3.2 239	22		1.16951	0	0	23.18	0
23	Het	col9a1b 222	23		0.36641	0	0	25.29	0		16.34	18.01		dlx3.2 239	23		0.95309	0	0	23.88	0
24	Wt	col9a1b 222	24		0.54729	0	0	24.82	0		16.27	18.29		dlx3.2 239	24		1.48629	0	0	23.35	0
25	Wt	col9a1b 222	25		0.30458	0	0	26.05	0		16.66	18.66		dlx3.2 239	25		0.46866	0	0	25.4	0
26	Mut	col9a1b 222	26		0.70329	0	0	25.71	0		17.41	19.65		dlx3.2 239	26		1.82035	0	0	24.3	0
27	Het	col9a1b 222	27		0.21829	0	0	27.03	0		17.2	19.12		dlx3.2 239	27		1.1635	0	0	24.58	0
28	Mut	col9a1b 222	28		0.25515	0	0	27.01	0		17.41	19.33		dlx3.2 239	28		0.75693	0	0	25.41	0
29	Het	col9a1b 222	29		0.16027	0	0	25.82	0		15.44	17.56		dlx3.2 239	29		1.05589	0	0	23.06	0
30	Het	col9a1b 222	30		0.71073	0	0	23.83	0		15.63	17.71		dlx3.2 239	30		0.98779	0	0	23.32	0
31	Wt	col9a1b 222	31		0.40862	0	0	25.26	0		16.24	18.36		dlx3.2 239	31		0.85345	0	0	24.16	0
32	Mut	col9a1b 222	32		0.97313	0	0	25.5	0		17.72	19.86		dlx3.2 239	32		1.07476	0	0	25.32	0
33	Wt	col9a1b 222	33		0.24	0	0	26.12	0		16.52	18.26		dlx3.2 239	33		0.68603	0	0	24.57	0
34		col9a1b 222	34		0.15323	0	0	31.85	0		21.52	23.42		dlx3.2 239	34		0.43064	0	0	30.32	0
35	Mut	col9a1b 222	35		0.30043	0	0	26.96	0		17.39	19.72		dlx3.2 239	35		2.10722	0	0	24.12	0
36	Wt	col9a1b 222	36		0.46507	0	0	25.16	0		16.3	18.47		dlx3.2 239	36		0.37368	0	0	25.44	0
37		col9a1b 222	37		0.92206	0	0	23.38	0		15.52	17.66		dlx3.2 239	37		0.8199	0	0	23.52	0
38	Wt	col9a1b 222	38		0.16533	0	0	26.29	0		16.02	18.03		dlx3.2 239	38		1.12244	0	0	23.5	0
39		col9a1b 222	39		0.33405	0	0	25.23	0		15.96	17.99		dlx3.2 239	39		1.10006	0	0	23.48	0
40	Wt	col9a1b 222	40		0.31166	0	0	25.42	0		16.02	18.13		dlx3.2 239	40		0.77442	0	0	24.08	0
41	Wt	col9a1b 222	41		0.20707	0	0	26.07	0		16.2	18.05		dlx3.2 239	41		0.98276	0	0	23.79	0
42	Het	col9a1b 222	42		0.4365	0	0	25.68	0		17.01	18.61		dlx3.2 239	42		1.15085	0	0	24.24	0
43	Het	col9a1b 222	43		1.65727	0	0	23.1	0		16.04	18.27		dlx3.2 239	43		1.02018	0	0	23.76	0
44	Wt	col9a1b 222	44		0.13419	0	0	26.08	0		15.57	17.44		dlx3.2 239	44		0.98554	0	0	23.16	0
45	Het	col9a1b 222	45		0.08936	0	0	27.05	0		16.02	17.77		dlx3.2 239	45		0.95719	0	0	23.59	0
46	Wt	col9a1b 222	46		0.1515	0	0	26.23	0		16.04	17.64		dlx3.2 239	46		1.32794	0	0	23.07	0
47	Mut	col9a1b 222	47		0.15412	0	0	26.26	0		16	17.77		dlx3.2 239	47		1.01879	0	0	23.5	0
48	Het	col9a1b 222	48		0.46515	0	0	25.64	0		16.96	18.76		dlx3.2 239	48		1.21448	0	0	24.22	0
1	Het	fgf8a 255	1		1.10514	0	0	26.23	0		15.74	17.92		fgfr2 274	1		0.72344	0	0	22.53	0
2	Het	fgf8a 255	2		1.41188	0	0	26.08	0		16.01	18.06		fgfr2 274	2		1.00337	0	0	22.26	0
3	Wt	fgf8a 255	3		0.96342	0	0	26.49	0		16.03	17.77		fgfr2 274	3		1.3624	0	0	21.69	0
4	Mut	fgf8a 255	4		1.03026	0	0	26.36	0		15.83	17.9		fgfr2 274	4		0.37646	0	0	23.51	0
5	Mut	fgf8a 255	5		0.52073	0	0	27.89	0		16.37	18.45		fgfr2 274	5		0.16722	0	0	25.23	0
6	Mut	fgf8a 255	6		1.15312	0	0	26.32	0		15.99	17.99		fgfr2 274	6		0.3489	0	0	23.74	0
7	Mut	fgf8a 255	7		1.09114	0	0	26.53	0		16.14	18.09		fgfr2 274	7		0.29289	0	0	24.12	0
8	Mut	fgf8a 255	8		1.29248	0	0	26.91	0		16.66	18.83		fgfr2 274	8		0.40028	0	0	24.3	0
9	Het	fgf8a 255	9		1.02273	0	0	26.74	0		16.27	18.19		fgfr2 274	9		0.95048	0	0	22.54	0
10	Mut	fgf8a 255	10		0.92406	0	0	27.02	0		16.47	18.26		fgfr2 274	10		0.35364	0	0	24.1	0
11	Wt	fgf8a 255	11		1.2617	0	0	29.43	0		18.95	21.5		fgfr2 274	11		1.16065	0	0	25.24	0
12	Het	fgf8a 255	12		0.92964	0	0	27.06	0		16.34	18.5		fgfr2 274	12		0.97348	0	0	22.69	0
13	Het	fgf8a 255	13		0.65573	0	0	26.65	0		15.61	17.4		fgfr2 274	13		0.60596	0	0	22.46	0
14	Het	fgf8a 255	14		0.7373	0	0	27.4	0		16.59	18.25		fgfr2 274	14		0.70858	0	0	23.15	0
15	Het	fgf8a 255	15		0.85249	0	0	26.78	0		16.01	18.01		fgfr2 274	15		0.83976	0	0	22.5	0
16	Het	fgf8a 255	16		0.64604	0	0	27.67	0		16.42	18.57		fgfr2 274	16		0.75075	0	0	23.15	0
17	Het	fgf8a 255	17		0.77506	0	0	27.13	0		16.13	18.31		fgfr2 274	17		0.7399	0	0	22.89	0
18		fgf8a 255	18		1.35319	0	0	27.2	0		17.23	18.96		fgfr2 274	18		1.0277	0	0	23.29	0
19	Wt	fgf8a 255	19		1.0628	0	0	26.59	0		16.07	18.22		fgfr2 274	19		1.45426	0	0	21.84	0
20	Wt	fgf8a 255	20		1.52351	0	0	26.3	0		16.29	18.46		fgfr2 274	20		1.52259	0	0	22	0
21	Het	fgf8a 255	21		0.9001	0	0	27.12	0		16.14	18.71		fgfr2 274	21		0.90027	0	0	22.82	0
22	Mut	fgf8a 255	22		0.94569	0	0	26.39	0		15.84	17.7		fgfr2 274	22		0.29865	0	0	23.75	0
23	Het	fgf8a 255	23		1.09546	0	0	26.58	0		16.34	18.01		fgfr2 274	23		0.5608	0	0	23.24	0
24	Wt	fgf8a 255	24		0.87854	0	0	27.01	0		16.27	18.29		fgfr2 274	24		1.29998	0	0	22.14	0
25	Wt	fgf8a 255	25		1.0501	0	0	27.13	0		16.66	18.66		fgfr2 274	25		1.15056	0	0	22.7	0
26	Mut	fgf8a 255	26		1.41452	0	0	27.57	0		17.41	19.65		fgfr2 274	26		0.40962	0	0	25.05	0
27	Het	fgf8a 255	27		1.01562	0	0	27.68	0		17.2	19.12		fgfr2 274	27		0.59812	0	0	24.14	0
28	Mut	fgf8a 255	28		0.98154	0	0	27.93	0		17.41	19.33		fgfr2 274	28		0.33674	0	0	25.17	0
29	Het	fgf8a 255	29		1.05589	0	0	25.96	0		15.44	17.56		fgfr2 274	29		0.7517	0	0	22.15	0
30	Het	fgf8a 255	30		1.0421	0	0	26.15	0		15.63	17.71		fgfr2 274	30		0.71102	0	0	22.4	0
31	Wt	fgf8a 255	31		0.89286	0	0	27	0		16.24	18.36		fgfr2 274	31		0.94463	0	0	22.61	0
32	Mut	fgf8a 255	32		1.51821	0	0	27.73	0		17.72	19.86		fgfr2 274	32		0.37773	0	0	25.43	0
33	Wt	fgf8a 255	33		0.88383	0	0	27.11	0		16.52	18.26		fgfr2 274	33		0.89909	0	0	22.78	0
34		fgf8a 255	34		2.08091	0	0	30.95	0		21.52	23.42		fgfr2 274	34		0.16123	0	0	30.34	0
35	Mut	fgf8a 255	35		1.25929	0	0	27.76	0		17.39	19.72		fgfr2 274	35		0.43134	0	0	25	0
36	Wt	fgf8a 255	36		0.74145	0	0	27.36	0		16.3	18.47		fgfr2 274	36		1.00356	0	0	22.62	0
37		fgf8a 255	37		1.05919	0	0	26.05	0		15.52	17.66		fgfr2 274	37		0.2616	0	0	23.76	0
38	Wt	fgf8a 255	38		1.20893	0	0	26.29	0		16.02	18.03		fgfr2 274	38		1.32295	0	0	21.86	0
39		fgf8a 255	39		1.29861	0	0	26.14	0		15.96	17.99		fgfr2 274	39		1.46571	0	0	21.66	0
40	Wt	fgf8a 255	40		1.09054	0	0	26.49	0		16.02	18.13		fgfr2 274	40		1.12072	0	0	22.14	0
41	Wt	fgf8a 255	41		1.0314	0	0	26.62	0		16.2	18.05		fgfr2 274	41		1.32961	0	0	21.95	0
42	Het	fgf8a 255	42		0.86694	0	0	27.55	0		17.01	18.61		fgfr2 274	42		1.0258	0	0	23.01	0
43	Het	fgf8a 255	43		1.1393	0	0	26.5	0		16.04	18.27		fgfr2 274	43		0.64534	0	0	23.02	0
44	Wt	fgf8a 255	44		1.0156	0	0	26.02	0		15.57	17.44		fgfr2 274	44		0.95273	0	0	21.81	0
45	Het	fgf8a 255	45		1.01453	0	0	26.41	0		16.02	17.77		fgfr2 274	45		0.78341	0	0	22.48	0
46	Wt	fgf8a 255	46		1.14348	0	0	26.19	0		16.04	17.64		fgfr2 274	46		1.29567	0	0	21.7	0
47	Mut	fgf8a 255	47		0.97104	0	0	26.47	0		16	17.77		fgfr2 274	47		0.27204	0	0	24	0
48	Het	fgf8a 255	48		0.83715	0	0	27.66	0		16.96	18.76		fgfr2 274	48		1.00446	0	0	23.09	0
1	Het	nkx3.2 240	1		0.74327	0	0	26.24	0		15.74	17.92		osx 60	1		1.28776	0	0	26.77	0
2	Het	nkx3.2 240	2		0.92816	0	0	26.12	0		16.01	18.06		osx 60	2		1.16028	0	0	27.12	0
3	Wt	nkx3.2 240	3		0.74544	0	0	26.3	0		16.03	17.77		osx 60	3		1.13649	0	0	27.02	0
4	Mut	nkx3.2 240	4		0.9155	0	0	25.97	0		15.83	17.9		osx 60	4		1.11342	0	0	27.01	0
5	Mut	nkx3.2 240	5		0.68126	0	0	26.95	0		16.37	18.45		osx 60	5		0.66328	0	0	28.31	0
6	Mut	nkx3.2 240	6		0.80743	0	0	26.28	0		15.99	17.99		osx 60	6		0.57512	0	0	28.09	0
7	Mut	nkx3.2 240	7		0.7247	0	0	26.56	0		16.14	18.09		osx 60	7		1.02231	0	0	27.39	0
8	Mut	nkx3.2 240	8		0.96481	0	0	26.78	0		16.66	18.83		osx 60	8		0.82513	0	0	28.33	0
9	Het	nkx3.2 240	9		0.70917	0	0	26.71	0		16.27	18.19		osx 60	9		1.28286	0	0	27.17	0
10	Mut	nkx3.2 240	10		1.01938	0	0	26.32	0		16.47	18.26		osx 60	10		0.9214	0	0	27.78	0
11	Wt	nkx3.2 240	11		1.08424	0	0	29.09	0		18.95	21.5		osx 60	11		1.89643	0	0	29.6	0
12	Het	nkx3.2 240	12		1.15147	0	0	26.2	0		16.34	18.5		osx 60	12		1.22144	0	0	27.43	0
13	Het	nkx3.2 240	13		0.44378	0	0	26.66	0		15.61	17.4		osx 60	13		0.57632	0	0	27.61	0
14	Het	nkx3.2 240	14		0.96098	0	0	26.46	0		16.59	18.25		osx 60	14		0.68515	0	0	28.27	0
15	Het	nkx3.2 240	15		0.9403	0	0	26.08	0		16.01	18.01		osx 60	15		1.07774	0	0	27.2	0
16	Het	nkx3.2 240	16		0.79822	0	0	26.81	0		16.42	18.57		osx 60	16		1.11753	0	0	27.64	0
17	Het	nkx3.2 240	17		0.9184	0	0	26.32	0		16.13	18.31		osx 60	17		1.10825	0	0	27.37	0
18		nkx3.2 240	18		0.7751	0	0	27.44	0		17.23	18.96		osx 60	18		1.00331	0	0	28.39	0
19	Wt	nkx3.2 240	19		0.89652	0	0	26.28	0		16.07	18.22		osx 60	19		1.27662	0	0	27.09	0
20	Wt	nkx3.2 240	20		1.55352	0	0	25.72	0		16.29	18.46		osx 60	20		1.29473	0	0	27.3	0
21	Het	nkx3.2 240	21		0.77793	0	0	26.77	0		16.14	18.71		osx 60	21		0.85553	0	0	27.96	0
22	Mut	nkx3.2 240	22		0.80727	0	0	26.06	0		15.84	17.7		osx 60	22		0.96019	0	0	27.13	0
23	Het	nkx3.2 240	23		0.85769	0	0	26.38	0		16.34	18.01		osx 60	23		0.8553	0	0	27.7	0
24	Wt	nkx3.2 240	24		0.94698	0	0	26.34	0		16.27	18.29		osx 60	24		1.13585	0	0	27.4	0
25	Wt	nkx3.2 240	25		0.72635	0	0	27.11	0		16.66	18.66		osx 60	25		0.71004	0	0	28.46	0
26	Mut	nkx3.2 240	26		1.0116	0	0	27.49	0		17.41	19.65		osx 60	26		1.36018	0	0	28.39	0
27	Het	nkx3.2 240	27		0.77657	0	0	27.51	0		17.2	19.12		osx 60	27		0.88543	0	0	28.64	0
28	Mut	nkx3.2 240	28		0.81612	0	0	27.64	0		17.41	19.33		osx 60	28		0.89894	0	0	28.83	0
29	Het	nkx3.2 240	29		1.05589	0	0	25.41	0		15.44	17.56		osx 60	29		0.82818	0	0	27.08	0
30	Het	nkx3.2 240	30		0.75063	0	0	26.06	0		15.63	17.71		osx 60	30		0.78417	0	0	27.32	0
31	Wt	nkx3.2 240	31		0.81303	0	0	26.58	0		16.24	18.36		osx 60	31		1.27321	0	0	27.25	0
32	Mut	nkx3.2 240	32		0.89506	0	0	27.93	0		17.72	19.86		osx 60	32		1.0579	0	0	29.01	0
33	Wt	nkx3.2 240	33		0.86166	0	0	26.59	0		16.52	18.26		osx 60	33		0.91018	0	0	27.83	0
34		nkx3.2 240	34		1.74447	0	0	30.65	0		21.52	23.42		osx 60	34		0.93186	0	0	32.87	0
35	Mut	nkx3.2 240	35		1.18369	0	0	27.29	0		17.39	19.72		osx 60	35		2.32839	0	0	27.64	0
36	Wt	nkx3.2 240	36		1.37086	0	0	25.91	0		16.3	18.47		osx 60	36		0.88536	0	0	27.87	0
37		nkx3.2 240	37		0.8146	0	0	25.87	0		15.52	17.66		osx 60	37		0.77395	0	0	27.27	0
38	Wt	nkx3.2 240	38		1.34982	0	0	25.57	0		16.02	18.03		osx 60	38		1.51695	0	0	26.73	0
39		nkx3.2 240	39		1.04554	0	0	25.89	0		15.96	17.99		osx 60	39		1.18623	0	0	27.03	0
40	Wt	nkx3.2 240	40		0.76837	0	0	26.43	0		16.02	18.13		osx 60	40		1.22446	0	0	27.08	0
41	Wt	nkx3.2 240	41		0.96669	0	0	26.15	0		16.2	18.05		osx 60	41		1.08476	0	0	27.31	0
42	Het	nkx3.2 240	42		1.21572	0	0	26.51	0		17.01	18.61		osx 60	42		1.05205	0	0	28.04	0
43	Het	nkx3.2 240	43		0.8567	0	0	26.36	0		16.04	18.27		osx 60	43		1.04045	0	0	27.4	0
44	Wt	nkx3.2 240	44		0.74808	0	0	25.91	0		15.57	17.44		osx 60	44		0.86082	0	0	27.03	0
45	Het	nkx3.2 240	45		0.81884	0	0	26.16	0		16.02	17.77		osx 60	45		1.07685	0	0	27.09	0
46	Wt	nkx3.2 240	46		0.81843	0	0	26.11	0		16.04	17.64		osx 60	46		1.07436	0	0	27.04	0
47	Mut	nkx3.2 240	47		1.00889	0	0	25.86	0		16	17.77		osx 60	47		0.92384	0	0	27.31	0
48	Het	nkx3.2 240	48		1.14386	0	0	26.65	0		16.96	18.76		osx 60	48		1.0568	0	0	28.09	0
1	Het	runx2a 236	1		1.31069	0	0	27.12	0		15.74	17.92		runx2b 237	1		1.07919	0	0	25.32	0
2	Het	runx2a 236	2		1.52624	0	0	27.1	0		16.01	18.06		runx2b 237	2		1.52624	0	0	25.02	0
3	Wt	runx2a 236	3		0.6772	0	0	28.13	0		16.03	17.77		runx2b 237	3		0.93666	0	0	25.59	0
4	Mut	runx2a 236	4		1.27033	0	0	27.19	0		15.83	17.9		runx2b 237	4		1.23302	0	0	25.16	0
5	Mut	runx2a 236	5		0.65615	0	0	28.69	0		16.37	18.45		runx2b 237	5		0.79523	0	0	26.34	0
6	Mut	runx2a 236	6		0.73832	0	0	28.1	0		15.99	17.99		runx2b 237	6		0.64062	0	0	26.23	0
7	Mut	runx2a 236	7		1.15402	0	0	27.58	0		16.14	18.09		runx2b 237	7		0.92993	0	0	25.82	0
8	Mut	runx2a 236	8		0.98218	0	0	28.44	0		16.66	18.83		runx2b 237	8		1.00617	0	0	26.33	0
9	Het	runx2a 236	9		0.81634	0	0	28.2	0		16.27	18.19		runx2b 237	9		1.39312	0	0	25.35	0
10	Mut	runx2a 236	10		0.38025	0	0	29.43	0		16.47	18.26		runx2b 237	10		0.93809	0	0	26.05	0
11	Wt	runx2a 236	11		0.71959	0	0	31.37	0		18.95	21.5		runx2b 237	11		1.06561	0	0	28.73	0
12	Het	runx2a 236	12		0.9922	0	0	28.1	0		16.34	18.5		runx2b 237	12		1.5177	0	0	25.42	0
13	Het	runx2a 236	13		0.4996	0	0	28.18	0		15.61	17.4		runx2b 237	13		0.67931	0	0	25.66	0
14	Het	runx2a 236	14		0.47038	0	0	29.18	0		16.59	18.25		runx2b 237	14		0.64265	0	0	26.66	0
15	Het	runx2a 236	15		0.74893	0	0	28.1	0		16.01	18.01		runx2b 237	15		1.08226	0	0	25.49	0
16	Het	runx2a 236	16		0.93011	0	0	28.28	0		16.42	18.57		runx2b 237	16		1.298	0	0	25.72	0
17	Het	runx2a 236	17		1.17196	0	0	27.66	0		16.13	18.31		runx2b 237	17		1.02848	0	0	25.78	0
18		runx2a 236	18		1.18358	0	0	28.52	0		17.23	18.96		runx2b 237	18		1.78536	0	0	25.85	0
19	Wt	runx2a 236	19		1.5979	0	0	27.14	0		16.07	18.22		runx2b 237	19		1.21226	0	0	25.46	0
20	Wt	runx2a 236	20		1.81397	0	0	27.19	0		16.29	18.46		runx2b 237	20		1.60472	0	0	25.29	0
21	Het	runx2a 236	21		1.77717	0	0	27.27	0		16.14	18.71		runx2b 237	21		0.86042	0	0	26.24	0
22	Mut	runx2a 236	22		0.92363	0	0	27.56	0		15.84	17.7		runx2b 237	22		0.87008	0	0	25.57	0
23	Het	runx2a 236	23		0.59657	0	0	28.59	0		16.34	18.01		runx2b 237	23		0.58897	0	0	26.54	0
24	Wt	runx2a 236	24		1.02716	0	0	27.91	0		16.27	18.29		runx2b 237	24		0.96594	0	0	25.93	0
25	Wt	runx2a 236	25		0.50088	0	0	29.34	0		16.66	18.66		runx2b 237	25		0.59531	0	0	27.01	0
26	Mut	runx2a 236	26		2.32716	0	0	27.98	0		17.41	19.65		runx2b 237	26		1.92015	0	0	26.19	0
27	Het	runx2a 236	27		1.43305	0	0	28.31	0		17.2	19.12		runx2b 237	27		0.80432	0	0	27.07	0
28	Mut	runx2a 236	28		1.21736	0	0	28.76	0		17.41	19.33		runx2b 237	28		1.01251	0	0	26.95	0
29	Het	runx2a 236	29		0.93328	0	0	27.28	0		15.44	17.56		runx2b 237	29		0.95631	0	0	25.17	0
30	Het	runx2a 236	30		0.56064	0	0	28.18	0		15.63	17.71		runx2b 237	30		0.62344	0	0	25.95	0
31	Wt	runx2a 236	31		1.5858	0	0	27.31	0		16.24	18.36		runx2b 237	31		1.42177	0	0	25.39	0
32	Mut	runx2a 236	32		1.98399	0	0	28.48	0		17.72	19.86		runx2b 237	32		1.54222	0	0	26.76	0
33	Wt	runx2a 236	33		0.7659	0	0	28.45	0		16.52	18.26		runx2b 237	33		0.75425	0	0	26.4	0
34		runx2a 236	34		0.18593	0	0	35.57	0		21.52	23.42		runx2b 237	34		0.26108	0	0	33	0
35	Mut	runx2a 236	35		1.80539	0	0	28.38	0		17.39	19.72		runx2b 237	35		1.872	0	0	26.25	0
36	Wt	runx2a 236	36		0.55389	0	0	28.91	0		16.3	18.47		runx2b 237	36		0.92588	0	0	26.1	0
37		runx2a 236	37		0.64605	0	0	27.9	0		15.52	17.66		runx2b 237	37		0.81468	0	0	25.49	0
38	Wt	runx2a 236	38		1.10589	0	0	27.55	0		16.02	18.03		runx2b 237	38		1.40611	0	0	25.13	0
39		runx2a 236	39		1.00828	0	0	27.64	0		15.96	17.99		runx2b 237	39		1.19981	0	0	25.31	0
40	Wt	runx2a 236	40		1.11774	0	0	27.58	0		16.02	18.13		runx2b 237	40		1.02961	0	0	25.63	0
41	Wt	runx2a 236	41		1.154	0	0	27.59	0		16.2	18.05		runx2b 237	41		0.57636	0	0	26.52	0
42	Het	runx2a 236	42		0.96357	0	0	28.54	0		17.01	18.61		runx2b 237	42		1.03562	0	0	26.36	0
43	Het	runx2a 236	43		0.81516	0	0	28.12	0		16.04	18.27		runx2b 237	43		0.72454	0	0	26.22	0
44	Wt	runx2a 236	44		0.77053	0	0	27.56	0		15.57	17.44		runx2b 237	44		0.49266	0	0	26.13	0
45	Het	runx2a 236	45		0.88248	0	0	27.75	0		16.02	17.77		runx2b 237	45		0.76266	0	0	25.88	0
46	Wt	runx2a 236	46		0.69968	0	0	28.03	0		16.04	17.64		runx2b 237	46		0.65012	0	0	26.06	0
47	Mut	runx2a 236	47		0.84563	0	0	27.8	0		16	17.77		runx2b 237	47		0.74623	0	0	25.91	0
48	Het	runx2a 236	48		0.85905	0	0	28.76	0		16.96	18.76		runx2b 237	48		0.77035	0	0	26.84	0
1	Het	fgfr1a 276	1		0.79224	0	0	24.08	0		15.74	17.92		fgfr1b 277	1		1.00747	0	0	25.5	0
2	Het	fgfr1a 276	2		0.80595	0	0	24.26	0		16.01	18.06		fgfr1b 277	2		1.32654	0	0	25.3	0
3	Wt	fgfr1a 276	3		0.73476	0	0	24.26	0		16.03	17.77		fgfr1b 277	3		1.09903	0	0	25.44	0
4	Mut	fgfr1a 276	4		0.66781	0	0	24.36	0		15.83	17.9		fgfr1b 277	4		1.30433	0	0	25.16	0
5	Mut	fgfr1a 276	5		0.50115	0	0	25.32	0		16.37	18.45		fgfr1b 277	5		1.48993	0	0	25.51	0
6	Mut	fgfr1a 276	6		0.50968	0	0	24.88	0		15.99	17.99		fgfr1b 277	6		1.02014	0	0	25.64	0
7	Mut	fgfr1a 276	7		0.55008	0	0	24.89	0		16.14	18.09		fgfr1b 277	7		0.52474	0	0	26.72	0
8	Mut	fgfr1a 276	8		0.41678	0	0	25.92	0		16.66	18.83		fgfr1b 277	8		0.56102	0	0	27.26	0
9	Het	fgfr1a 276	9		1.01084	0	0	24.13	0		16.27	18.19		fgfr1b 277	9		0.9805	0	0	25.94	0
10	Mut	fgfr1a 276	10		0.51864	0	0	25.22	0		16.47	18.26		fgfr1b 277	10		0.8116	0	0	26.34	0
11	Wt	fgfr1a 276	11		0.49532	0	0	28.15	0		18.95	21.5		fgfr1b 277	11		0.3349	0	0	30.48	0
12	Het	fgfr1a 276	12		0.7503	0	0	24.75	0		16.34	18.5		fgfr1b 277	12		1.23235	0	0	25.8	0
13	Het	fgfr1a 276	13		0.40242	0	0	24.73	0		15.61	17.4		fgfr1b 277	13		0.78032	0	0	25.54	0
14	Het	fgfr1a 276	14		0.28525	0	0	26.14	0		16.59	18.25		fgfr1b 277	14		0.81409	0	0	26.39	0
15	Het	fgfr1a 276	15		0.40854	0	0	25.21	0		16.01	18.01		fgfr1b 277	15		0.73393	0	0	26.13	0
16	Het	fgfr1a 276	16		0.43188	0	0	25.63	0		16.42	18.57		fgfr1b 277	16		0.65412	0	0	26.79	0
17	Het	fgfr1a 276	17		0.43565	0	0	25.33	0		16.13	18.31		fgfr1b 277	17		1.19575	0	0	25.64	0
18		fgfr1a 276	18		0.49985	0	0	26.01	0		17.23	18.96		fgfr1b 277	18		1.99514	0	0	25.77	0
19	Wt	fgfr1a 276	19		0.49429	0	0	25.07	0		16.07	18.22		fgfr1b 277	19		0.86436	0	0	26.03	0
20	Wt	fgfr1a 276	20		0.57497	0	0	25.09	0		16.29	18.46		fgfr1b 277	20		1.51478	0	0	25.45	0
21	Het	fgfr1a 276	21		0.46856	0	0	25.44	0		16.14	18.71		fgfr1b 277	21		1.05998	0	0	26.02	0
22	Mut	fgfr1a 276	22		0.38924	0	0	25.04	0		15.84	17.7		fgfr1b 277	22		1.00141	0	0	25.44	0
23	Het	fgfr1a 276	23		0.30964	0	0	25.78	0		16.34	18.01		fgfr1b 277	23		0.71944	0	0	26.33	0
24	Wt	fgfr1a 276	24		0.46105	0	0	25.31	0		16.27	18.29		fgfr1b 277	24		1.25464	0	0	25.63	0
25	Wt	fgfr1a 276	25		0.52354	0	0	25.51	0		16.66	18.66		fgfr1b 277	25		1.01364	0	0	26.32	0
26	Mut	fgfr1a 276	26		1.00874	0	0	25.43	0		17.41	19.65		fgfr1b 277	26		1.70753	0	0	26.43	0
27	Het	fgfr1a 276	27		0.68464	0	0	25.62	0		17.2	19.12		fgfr1b 277	27		1.21991	0	0	26.55	0
28	Mut	fgfr1a 276	28		0.62999	0	0	25.95	0		17.41	19.33		fgfr1b 277	28		0.87769	0	0	27.23	0
29	Het	fgfr1a 276	29		1.05589	0	0	23.34	0		15.44	17.56		fgfr1b 277	29		1.05589	0	0	25.1	0
30	Het	fgfr1a 276	30		0.75715	0	0	23.98	0		15.63	17.71		fgfr1b 277	30		1.00733	0	0	25.34	0
31	Wt	fgfr1a 276	31		1.11269	0	0	24.06	0		16.24	18.36		fgfr1b 277	31		1.10361	0	0	25.83	0
32	Mut	fgfr1a 276	32		0.6502	0	0	26.33	0		17.72	19.86		fgfr1b 277	32		1.15766	0	0	27.26	0
33	Wt	fgfr1a 276	33		0.41243	0	0	25.58	0		16.52	18.26		fgfr1b 277	33		0.75413	0	0	26.47	0
34		fgfr1a 276	34		0.10808	0	0	32.59	0		21.52	23.42		fgfr1b 277	34		0.11984	0	0	34.21	0
35	Mut	fgfr1a 276	35		0.5981	0	0	26.21	0		17.39	19.72		fgfr1b 277	35		0.84141	0	0	27.48	0
36	Wt	fgfr1a 276	36		0.54362	0	0	25.18	0		16.3	18.47		fgfr1b 277	36		0.60326	0	0	26.79	0
37		fgfr1a 276	37		0.42825	0	0	24.73	0		15.52	17.66		fgfr1b 277	37		0.75357	0	0	25.68	0
38	Wt	fgfr1a 276	38		0.52541	0	0	24.87	0		16.02	18.03		fgfr1b 277	38		0.64102	0	0	26.34	0
39		fgfr1a 276	39		0.41595	0	0	25.16	0		15.96	17.99		fgfr1b 277	39		0.57028	0	0	26.46	0
40	Wt	fgfr1a 276	40		0.24659	0	0	26.01	0		16.02	18.13		fgfr1b 277	40		0.40554	0	0	27.05	0
41	Wt	fgfr1a 276	41		0.7708	0	0	24.41	0		16.2	18.05		fgfr1b 277	41		0.47378	0	0	26.88	0
42	Het	fgfr1a 276	42		0.78441	0	0	25.07	0		17.01	18.61		fgfr1b 277	42		0.54064	0	0	27.37	0
43	Het	fgfr1a 276	43		0.89239	0	0	24.23	0		16.04	18.27		fgfr1b 277	43		0.41411	0	0	27.1	0
44	Wt	fgfr1a 276	44		0.60536	0	0	24.14	0		15.57	17.44		fgfr1b 277	44		0.45467	0	0	26.32	0
45	Het	fgfr1a 276	45		0.67769	0	0	24.37	0		16.02	17.77		fgfr1b 277	45		0.57768	0	0	26.36	0
46	Wt	fgfr1a 276	46		0.75157	0	0	24.17	0		16.04	17.64		fgfr1b 277	46		0.4677	0	0	26.61	0
47	Mut	fgfr1a 276	47		0.56441	0	0	24.63	0		16	17.77		fgfr1b 277	47		0.39257	0	0	26.92	0
48	Het	fgfr1a 276	48		0.45003	0	0	25.93	0		16.96	18.76		fgfr1b 277	48		0.48583	0	0	27.58	0
1	Het	fgfr3 278	1		0.61728	0	0	27.32	0		15.74	17.92		fgfr4 279	1		1.00413	0	0	22.87	0
2	Het	fgfr3 278	2		0.86455	0	0	27.04	0		16.01	18.06		fgfr4 279	2		1.1528	0	0	22.88	0
3	Wt	fgfr3 278	3		0.80185	0	0	27.01	0		16.03	17.77		fgfr4 279	3		0.90016	0	0	23.1	0
4	Mut	fgfr3 278	4		0.63447	0	0	27.31	0		15.83	17.9		fgfr4 279	4		0.8648	0	0	23.12	0
5	Mut	fgfr3 278	5		0.41149	0	0	28.48	0		16.37	18.45		fgfr4 279	5		1.32292	0	0	23.06	0
6	Mut	fgfr3 278	6		0.48743	0	0	27.82	0		15.99	17.99		fgfr4 279	6		1.20675	0	0	22.77	0
7	Mut	fgfr3 278	7		0.77599	0	0	27.27	0		16.14	18.09		fgfr4 279	7		0.94514	0	0	23.25	0
8	Mut	fgfr3 278	8		0.63073	0	0	28.2	0		16.66	18.83		fgfr4 279	8		1.06187	0	0	23.71	0
9	Het	fgfr3 278	9		0.70482	0	0	27.53	0		16.27	18.19		fgfr4 279	9		0.89424	0	0	23.44	0
10	Mut	fgfr3 278	10		0.64818	0	0	27.78	0		16.47	18.26		fgfr4 279	10		0.6537	0	0	24.02	0
11	Wt	fgfr3 278	11		0.3936	0	0	31.36	0		18.95	21.5		fgfr4 279	11		0.52159	0	0	27.21	0
12	Het	fgfr3 278	12		0.89474	0	0	27.37	0		16.34	18.5		fgfr4 279	12		0.79132	0	0	23.81	0
13	Het	fgfr3 278	13		0.58333	0	0	27.08	0		15.61	17.4		fgfr4 279	13		0.5898	0	0	23.32	0
14	Het	fgfr3 278	14		0.54611	0	0	28.08	0		16.59	18.25		fgfr4 279	14		0.61399	0	0	24.17	0
15	Het	fgfr3 278	15		0.68472	0	0	27.35	0		16.01	18.01		fgfr4 279	15		0.8906	0	0	23.22	0
16	Het	fgfr3 278	16		0.79613	0	0	27.62	0		16.42	18.57		fgfr4 279	16		0.70385	0	0	24.05	0
17	Het	fgfr3 278	17		1.352	0	0	26.58	0		16.13	18.31		fgfr4 279	17		0.9531	0	0	23.34	0
18		fgfr3 278	18		1.93737	0	0	26.93	0		17.23	18.96		fgfr4 279	18		1.02896	0	0	24.1	0
19	Wt	fgfr3 278	19		1.54115	0	0	26.31	0		16.07	18.22		fgfr4 279	19		1.05801	0	0	23.11	0
20	Wt	fgfr3 278	20		0.98372	0	0	27.19	0		16.29	18.46		fgfr4 279	20		0.88943	0	0	23.59	0
21	Het	fgfr3 278	21		1.41487	0	0	26.72	0		16.14	18.71		fgfr4 279	21		0.75211	0	0	23.89	0
22	Mut	fgfr3 278	22		0.93236	0	0	26.66	0		15.84	17.7		fgfr4 279	22		0.8635	0	0	23.03	0
23	Het	fgfr3 278	23		0.67923	0	0	27.52	0		16.34	18.01		fgfr4 279	23		0.70883	0	0	23.72	0
24	Wt	fgfr3 278	24		1.11385	0	0	26.92	0		16.27	18.29		fgfr4 279	24		0.91745	0	0	23.45	0
25	Wt	fgfr3 278	25		0.96417	0	0	27.51	0		16.66	18.66		fgfr4 279	25		0.7041	0	0	24.22	0
26	Mut	fgfr3 278	26		1.23185	0	0	28.02	0		17.41	19.65		fgfr4 279	26		1.01451	0	0	24.56	0
27	Het	fgfr3 278	27		0.88502	0	0	28.13	0		17.2	19.12		fgfr4 279	27		0.77198	0	0	24.58	0
28	Mut	fgfr3 278	28		0.78048	0	0	28.52	0		17.41	19.33		fgfr4 279	28		0.54782	0	0	25.29	0
29	Het	fgfr3 278	29		1.05589	0	0	26.22	0		15.44	17.56		fgfr4 279	29		1.05589	0	0	22.47	0
30	Het	fgfr3 278	30		0.77765	0	0	26.82	0		15.63	17.71		fgfr4 279	30		0.77551	0	0	23.08	0
31	Wt	fgfr3 278	31		0.92221	0	0	27.21	0		16.24	18.36		fgfr4 279	31		0.62901	0	0	24.01	0
32	Mut	fgfr3 278	32		1.07887	0	0	28.47	0		17.72	19.86		fgfr4 279	32		0.88759	0	0	25.01	0
33	Wt	fgfr3 278	33		0.82803	0	0	27.45	0		16.52	18.26		fgfr4 279	33		0.73003	0	0	23.89	0
34		fgfr3 278	34		0.19875	0	0	34.59	0		21.52	23.42		fgfr4 279	34		0.36763	0	0	29.96	0
35	Mut	fgfr3 278	35		0.78093	0	0	28.7	0		17.39	19.72		fgfr4 279	35		0.9781	0	0	24.63	0
36	Wt	fgfr3 278	36		0.8356	0	0	27.44	0		16.3	18.47		fgfr4 279	36		0.56973	0	0	24.25	0
37		fgfr3 278	37		0.93529	0	0	26.48	0		15.52	17.66		fgfr4 279	37		0.75188	0	0	23.05	0
38	Wt	fgfr3 278	38		1.40986	0	0	26.32	0		16.02	18.03		fgfr4 279	38		0.75781	0	0	23.47	0
39		fgfr3 278	39		1.22726	0	0	26.47	0		15.96	17.99		fgfr4 279	39		0.95528	0	0	23.09	0
40	Wt	fgfr3 278	40		0.61912	0	0	27.55	0		16.02	18.13		fgfr4 279	40		0.9231	0	0	23.23	0
41	Wt	fgfr3 278	41		0.83302	0	0	27.18	0		16.2	18.05		fgfr4 279	41		0.79683	0	0	23.5	0
42	Het	fgfr3 278	42		0.98336	0	0	27.63	0		17.01	18.61		fgfr4 279	42		0.78557	0	0	24.21	0
43	Het	fgfr3 278	43		0.7564	0	0	27.35	0		16.04	18.27		fgfr4 279	43		0.76349	0	0	23.59	0
44	Wt	fgfr3 278	44		0.59023	0	0	27.06	0		15.57	17.44		fgfr4 279	44		0.65399	0	0	23.17	0
45	Het	fgfr3 278	45		0.82915	0	0	26.96	0		16.02	17.77		fgfr4 279	45		0.82913	0	0	23.21	0
46	Wt	fgfr3 278	46		0.97351	0	0	26.67	0		16.04	17.64		fgfr4 279	46		0.76648	0	0	23.27	0
47	Mut	fgfr3 278	47		0.76017	0	0	27.08	0		16	17.77		fgfr4 279	47		0.49181	0	0	23.96	0
48	Het	fgfr3 278	48		1.26273	0	0	27.32	0		16.96	18.76		fgfr4 279	48		0.58207	0	0	24.69	0
1	Het	fgf3 280	1		1.06636	0	0	26.19	0		15.74	17.92
2	Het	fgf3 280	2		1.14934	0	0	26.29	0		16.01	18.06
3	Wt	fgf3 280	3		1.19816	0	0	26.09	0		16.03	17.77
4	Mut	fgf3 280	4		1.09688	0	0	26.18	0		15.83	17.9
5	Mut	fgf3 280	5		0.99032	0	0	26.88	0		16.37	18.45
6	Mut	fgf3 280	6		1.181	0	0	26.2	0		15.99	17.99
7	Mut	fgf3 280	7		1.31341	0	0	26.18	0		16.14	18.09
8	Mut	fgf3 280	8		1.03927	0	0	27.14	0		16.66	18.83
9	Het	fgf3 280	9		1.1464	0	0	26.49	0		16.27	18.19
10	Mut	fgf3 280	10		0.77409	0	0	27.19	0		16.47	18.26
11	Wt	fgf3 280	11		1.55989	0	0	29.04	0		18.95	21.5
12	Het	fgf3 280	12		1.03431	0	0	26.83	0		16.34	18.5
13	Het	fgf3 280	13		0.78099	0	0	26.32	0		15.61	17.4
14	Het	fgf3 280	14		0.66639	0	0	27.46	0		16.59	18.25
15	Het	fgf3 280	15		1.13621	0	0	26.28	0		16.01	18.01
16	Het	fgf3 280	16		1.37969	0	0	26.49	0		16.42	18.57
17	Het	fgf3 280	17		0.79713	0	0	27	0		16.13	18.31
18		fgf3 280	18		1.08688	0	0	27.43	0		17.23	18.96
19	Wt	fgf3 280	19		1.04939	0	0	26.53	0		16.07	18.22
20	Wt	fgf3 280	20		1.24867	0	0	26.51	0		16.29	18.46
21	Het	fgf3 280	21		0.79677	0	0	27.21	0		16.14	18.71
22	Mut	fgf3 280	22		0.86815	0	0	26.43	0		15.84	17.7
23	Het	fgf3 280	23		0.8341	0	0	26.89	0		16.34	18.01
24	Wt	fgf3 280	24		1.10673	0	0	26.59	0		16.27	18.29
25	Wt	fgf3 280	25		0.83536	0	0	27.38	0		16.66	18.66
26	Mut	fgf3 280	26		0.79555	0	0	28.31	0		17.41	19.65
27	Het	fgf3 280	27		0.69399	0	0	28.14	0		17.2	19.12
28	Mut	fgf3 280	28		0.44469	0	0	28.99	0		17.41	19.33
29	Het	fgf3 280	29		1.03726	0	0	25.9	0		15.44	17.56
30	Het	fgf3 280	30		0.81022	0	0	26.43	0		15.63	17.71
31	Wt	fgf3 280	31		0.76369	0	0	27.14	0		16.24	18.36
32	Mut	fgf3 280	32		1.04491	0	0	28.18	0		17.72	19.86
33	Wt	fgf3 280	33		0.86777	0	0	27.05	0		16.52	18.26
34		fgf3 280	34		1.20544	0	0	31.65	0		21.52	23.42
35	Mut	fgf3 280	35		1.02949	0	0	27.97	0		17.39	19.72
36	Wt	fgf3 280	36		0.52388	0	0	27.77	0		16.3	18.47
37		fgf3 280	37		0.7815	0	0	26.4	0		15.52	17.66
38	Wt	fgf3 280	38		1.19136	0	0	26.23	0		16.02	18.03
39		fgf3 280	39		1.22356	0	0	26.14	0		15.96	17.99
40	Wt	fgf3 280	40		1.34388	0	0	26.1	0		16.02	18.13
41	Wt	fgf3 280	41		1.33653	0	0	26.16	0		16.2	18.05
42	Het	fgf3 280	42		1.11804	0	0	27.1	0		17.01	18.61
43	Het	fgf3 280	43		1.24352	0	0	26.29	0		16.04	18.27
44	Wt	fgf3 280	44		1.02677	0	0	25.92	0		15.57	17.44
45	Het	fgf3 280	45		0.94669	0	0	26.43	0		16.02	17.77
46	Wt	fgf3 280	46		1.27135	0	0	25.95	0		16.04	17.64
47	Mut	fgf3 280	47		1.37986	0	0	25.88	0		16	17.77
48	Het	fgf3 280	48		1.21182	0	0	27.04	0		16.96	18.76

## Sheet: genestudy group
relative, normalized expression (group)										Ct	Ct											Target	Coefficient Variance	M Value
										elf1a	rpl13											elf1a 80	0.0064	0.0184
	Target	Biological Set	Ctrl	Expression	Expression SEM	Corrected Expression SEM	Mean Cq	Cq SEM		80	83		Target	Biological Set	Ctrl	Expression	Expression SEM	Corrected Expression SEM	Mean Cq	Cq SEM		rpl13 83	0.0064	0.0184
	col1a1 207	Wt		1.02237	0.21116	0.21116	18.08	0.2476		16.37	18.38		col1a2 16	Wt		1.06581	0.22549	0.22549	19.69	0.25628
	col1a1 207	Het		1	0.12301	0.12301	17.95	0.15911		16.22	18.21		col1a2 16	Het		1	0.10841	0.10841	19.62	0.13523
	col1a1 207	Mut		0.75491	0.17455	0.17455	18.76	0.29549		16.6	18.63		col1a2 16	Mut		0.78027	0.15983	0.15983	20.38	0.25174
	col2a1 238	Wt		0.95466	0.24061	0.24061	19.63	0.32362		16.37	18.38		col9a1a 221	Wt		1.0524	0.21559	0.21559	22.71	0.24466
	col2a1 238	Het		1	0.10577	0.10577	19.4	0.1308		16.22	18.21		col9a1a 221	Het		1	0.11758	0.11758	22.62	0.15033
	col2a1 238	Mut		1.02154	0.20217	0.20217	19.77	0.23991		16.6	18.63		col9a1a 221	Mut		1.04829	0.21945	0.21945	22.95	0.25933
	col9a1b 222	Wt		0.95872	0.21773	0.21773	25.94	0.28261		16.37	18.38		dlx3.2 239	Wt		0.8233	0.183	0.183	24.17	0.2745
	col9a1b 222	Het		1	0.22985	0.22985	25.72	0.32215		16.22	18.21		dlx3.2 239	Het		1	0.08717	0.08717	23.73	0.09817
	col9a1b 222	Mut		1.04467	0.18259	0.18259	26.06	0.19906		16.6	18.63		dlx3.2 239	Mut		0.99619	0.18423	0.18423	24.14	0.2173
	fgf8a 255	Wt		1.11303	0.21561	0.21561	26.86	0.22497		16.37	18.38		fgfr2 274	Wt		1.11788	0.22868	0.22868	22.36	0.24415
	fgf8a 255	Het		1	0.10921	0.10921	26.85	0.13656		16.22	18.21		fgfr2 274	Het		0.73495	0.06912	0.06912	22.81	0.11059
	fgf8a 255	Mut		1.13477	0.19305	0.19305	27.07	0.19046		16.6	18.63		fgfr2 274	Mut		0.31103	0.05391	0.05391	24.45	0.19639
	nkx3.2 240	Wt		1.09932	0.21569	0.21569	26.44	0.22942		16.37	18.38		osx 60	Wt		1.11788	0.20184	0.20184	27.5	0.20091
	nkx3.2 240	Het		1	0.08918	0.08918	26.41	0.10187		16.22	18.21		osx 60	Het		0.96613	0.0932	0.0932	27.55	0.11485
	nkx3.2 240	Mut		1.03776	0.18326	0.18326	26.76	0.20235		16.6	18.63		osx 60	Mut		0.9795	0.1666	0.1666	27.93	0.19039
	runx2a 236	Wt		1.03726	0.24731	0.24731	28.15	0.30138		16.37	18.38		runx2b 237	Wt		0.99351	0.20442	0.20442	26.1	0.24622
	runx2a 236	Het		1	0.10932	0.10932	28.04	0.13674		16.22	18.21		runx2b 237	Het		1	0.11201	0.11201	25.93	0.1412
	runx2a 236	Mut		1.18338	0.19461	0.19461	28.2	0.1798		16.6	18.63		runx2b 237	Mut		1.14858	0.16633	0.16633	26.13	0.14031
	fgfr1a 276	Wt		0.94745	0.21599	0.21599	25.13	0.28405		16.37	18.38		fgfr1b 277	Wt		0.85162	0.2192	0.2192	26.55	0.33226
	fgfr1a 276	Het		1	0.14093	0.14093	24.89	0.18752		16.22	18.21		fgfr1b 277	Het		1	0.13006	0.13006	26.15	0.17039
	fgfr1a 276	Mut		0.9627	0.16005	0.16005	25.35	0.18321		16.6	18.63		fgfr1b 277	Mut		1.07809	0.21244	0.21244	26.45	0.23844
	fgfr3 278	Wt		1.0334	0.2614	0.2614	27.37	0.3251		16.37	18.38		fgfr4 279	Wt		0.9503	0.21502	0.21502	23.82	0.2812
	fgfr3 278	Het		1	0.09687	0.09687	27.26	0.11557		16.22	18.21		fgfr4 279	Het		1	0.11304	0.11304	23.59	0.14289
	fgfr3 278	Mut		0.87034	0.14779	0.14779	27.86	0.18988		16.6	18.63		fgfr4 279	Mut		1.0888	0.21908	0.21908	23.87	0.24557
	fgf3 280	Wt		1.08984	0.21585	0.21585	26.75	0.23272		16.37	18.38
	fgf3 280	Het		1	0.10493	0.10493	26.71	0.12938		16.22	18.21
	fgf3 280	Mut		0.98979	0.22837	0.22837	27.13	0.29468		16.6	18.63

## Sheet: genotyping
sample						gels:
	1		PCR	fwRsa/revQ-PCR																			PCR	leftover PCR fragment: fwRsa/revQ-PCR
			Digest	RsaI																			Digest	with more RsaI and longer incubation
1	Het
2	Het
3	Wt
4	Mut
4	Mut
5	Mut
7	Mut
8	Mut
9	Het
10	Mut
11	Wt
12	Het
13	Het
14	Het
15	Het
16	Het
17	Het
18
19	Wt
20	Wt
21	Het
22	Mut
23	Het
24	Wt
25	Wt
26	Mut
27	Het
28	Mut
29	Het
30	Het
31	Wt
32	Mut
33	Wt
34
35	Mut
36	Wt
37
38	Wt
39
40	Wt
41	Wt
42	Het
43	Het
44	Wt
45	Het
46	Wt
47	Mut
48	Het
Mut	12
Het	18
Wt	14
