# Supplementary material for: Targeting fibroblast growth factor receptors causes severe craniofacial malformations in zebrafish larvae
Source: PeerJ. 2022 Nov 23;10:e14338. doi: 10.7717/peerj.14338 (PMC9700454; doi:10.7717/peerj.14338)
Supplement: Supplemental Information 3 [file peerj-10-14338-s003.xlsx]

## Sheet: 0-12hpf
DMSO	1	2	3	4	5	6	7	8	9
	Total head length	length ceratohyal to anterior end	length ceratohyal to posterior end	Width MP	Width CP	Length ceratohyal superior	Length ceratohyal inferior	Length ethmoid plate (ET)	Lat length Meckel’s (MC)
1	664.487	166.66	497.827		330.635	229.271	239.981	333.141	135.632
2	623.161	184.599	438.562	237.819	367.624	251.108	260.038	335.549	117.803
3	555.71	158.198	397.512	300.32	247.652	192.996	196.715	315.646	124.733
4	581.222	141.732	439.49	175.642	270.834	209.563	208.123	303.681	148.624
5	618.71	171.623	447.087	221.012	344.229	220.312	215.507	340.033	128.354
6	631.648	157.459	474.188	241.201	348.366	219.705	226.333	317.167	129.944
7	515.896	139.016	376.88	207.062	291.185	196.771	194.063	274.041	122.638
8	562.42	137.657	424.763	230.077	303.658	216.873	212.98	322.552	104.797
9	681.746	179.638	502.107	270.899	357.865	225.785	225.325	307.221	147.165
10	567.843	162.042	405.801	266.948	254.988	157.823	168.757	240.535	115.718
11	550.459	143.703	406.755	224.156	198.682	213.124	216.365	349.583	144.012
12	660.08	201.333	458.748	162.042	357.833	243.081	240.582	316.294	146.939
13	545.254	146.093	399.161	258.306	235.626	229.388	223.742	263.275	150.388
				187.775
1 µM	1	2	3		5	6	7	8	9
	Total head length	length ceratohyal to anterior end	length ceratohyal to posterior end	4	Width CP	Length ceratohyal superior	Length ceratohyal inferior	Length ethmoid plate (ET)	Lat length Meckel’s (MC)
1	611.194	156.646	454.548	Width MP	298.753	219.369	201.365	359.235	125.414
2	615.435	164.676	450.759	239.49	289.54	219.115	224.21	367.472	158.11
3	599.616	197.279	402.337	227.182	320.075	210.792	204.901	341.381	123.203
4	630.086	219.887	410.199	245.901	364.611	190.462	197.396	284.253	122.373
5	694.07	259.622	434.448	259.536	398.665	207.825	215.396	369.633	153.645
6	602.85	157.312	445.538	264.957	314.106	209.44	219.482	359.31	121.843
7	621.787	167.347	454.44	255.732	308.856	223.146	207.393	322.39	129.624
8	629.047	144.858	484.189	243.571	260.891	212.633	210.216	308.918	145.883
9	732.686	297.863	434.823	228.976	394.335	203.559	200.074	337.812	172.982
10	644.291	216.941	427.35	275.926	300.68	206.843	214.164	344.001	140.163
11	590.38	166.543	423.837	217.959	263.949	192.837	209.405	349.793	115.646
12	579.356	142.961	436.395	219.052	268.703	197.616	201.471	315.49	84.3565
13	608.347	190.651	417.696	207.932	360.67	193.91	201.912	332.474	109.259
14	615.041	198.714	416.327	273.5	355.105	197.897	204.036	350.928	112.999
15	660.232	231.088	429.144	261.281	325.886	191.469	197.504	334.148	140.195
16	612.435	170.155	442.28	232.191	340.204	191.508	204.901	310.335	116.157
17	635.643	181.203	454.44	231.309	349.98	218.388	223.403	339.714	125.288
18	610.124	201.305	408.818	251.759	285.546	206.022	201.512	343.831	135.564
19	634.707	254.825	379.882	238.62	287.423	171.029	179.674	325.593	124.414
20	654.709	262.02	392.688	240.847	355.854	181.906	195.772	371.867	140.933
21	532.444	159.236	373.208	253.24	273.744	170.351	167.937	294.297	96.8381
22	622.617	188.154	434.463	197.284	312.422	206.861	196.15	326.799	138.281
23	578.546	195.36	383.186	238.095	302.041	175.61	193.489	275.527	97.9973
24	607.674	158.198	449.476	228.717	316.068	205.171	225.194	330.601	100.652
25	631.715	209.806	421.909	241.005	338.207	200.116	212.667	343.935	118.14
				261.822
2.5 µM	1	2	3		5	6	7	8	9
	Total head length	length ceratohyal to anterior end	length ceratohyal to posterior end	4	Width CP	Length ceratohyal superior	Length ceratohyal inferior	Length ethmoid plate (ET)	Lat length Meckel’s (MC)
1	551.126	131.467	419.659	Width MP	295.263	201.457	193.963	317.788	107.904
2	518.963	141.66	377.303	213.224	323.964	191.102	182.033	308.352	87.5204
3	544.809	142.286	402.523	229.174	260.035	167.85	181.233	336.114	110.271
4	527.043	144.941	382.102	199.982	296.412	188.719	176.556	333.225	98.3361
5	584.313	158.408	425.905	193.762	388.909	197.335	178.044	339.714	100.652
6	611.082	158.724	452.358	244.993	274.671	228.19	224.386	341.562	132.951
7	525.295	123.877	401.418	247.342	278.965	206.09	190.598	336.528	99.3197
8	601.615	195.502	406.113	197.284	317.788	203.937	200.882	286.345	99.7939
9	550.24	118.399	431.841	246.555	306.135	200.116	205.027	328.071	103.437
10	559.535	190.787	368.748	219.086	336.231	191.856	182.257	318.103	111.216
11	585.171	253.678	331.493	221.786	365.204	192.914	181.693	324.095	115.966
12	539.754	145.851	393.903	264.957	335.404	198.192	185.454	332.678	82.6469
13	615.17	196.597	418.573	220.995	343.386	203.505	209.405	329.454	125.436
14	565.508	184.979	380.529	273.956	321.403	207.678	215.09	339.166	135.564
15	607.314	199.203	408.111	210.709	354.058	206.022	215.676	322.736	110.204
16	522.577	115.774	406.803	282.816	287.104	212.498	204.919	308.366	94.751
17	567.876	244.281	323.595	238.111	351.4	181.662	168.795	306.316	104.15
18	500.733	204.122	296.611	228.976	364.717	157.753	168.252	267.654	91.0755
19	592.255	161.033	431.222	239.49	327.239	205.915	209.09	288.271	94.2707
20	595.927	187.755	408.172	252.2	342.868	216.72	207.344	329.65	128.246
21	607.894	143.787	464.107	261.578	287.104	221.505	211.165	324.224	119.147
22	545.69	140.136	405.554	250.34	295.351	200.863	200.167	277.157	103.839
				235.39
5 µM	1	2	3		5	6	7	8	9
	Total head length	length ceratohyal to anterior end	length ceratohyal to posterior end	4	Width CP	Length ceratohyal superior	Length ceratohyal inferior	Length ethmoid plate (ET)	Lat length Meckel’s (MC)
1	554.9	187.439	367.461	Width MP	342.684	184.317	202.689	302.448	78.9585
2	469.181	197.059	272.122	202.031	354.497	136.441	174.33	299.969	56.0966
3	559.529	285.786	273.744	210.954	378.026	150.184	181.28	337.548
4	577.095	279.124	297.971		358.214	143.019	179.412	341.269
5	560.619	217.708	342.911		393.67	177.362	193.503	346.992	86.9259
6	493.737	143.297	350.44	244.251	349.903	166.02	160.734	338.859	94.3102
7	591.895	170.302	421.593	239.954	354.33	198.49	196.607	362.321	88.8116
8	519.873	102.077	417.796	290.128	309.834	198.267	178.314	358.027	47.5993
9	464.859	248.563	216.297	207.42	310.646	115.846	128.678	295.351
10	494.375	260.955	233.42		326.556	172.805	152.927	343.119	89.134
11	600.014	172.08	427.934	201.622	347.823	204.195	210.044	317.369	119.271
12	530.709	171.515	359.194	227.484	308.846	188.719	189.722	325.571	96.2918
13	558.272	278.403	279.869	225.887	365.123	157.899	169.129	336.057
14	531.882	242.291	289.591		317.788	145.527	160.717	317.427
15	567.324	168.713	398.612		313.882	195.133	189.355	352.956	88.634
16	386.783	140.69	246.093	213.359	310.29	133.312	150.277	213.831
17	453.433	201.434	251.999		247.354	108.92	108.633	275.254
18	437.352	206.74	230.612		332.042	152.872	169.78	278.802
19	505.411	149.195	356.216		336.206	168.675	178.252	266.878
20	436.913	250.473	186.439		306.558	140.933	172.512	279.954
21	481.013	270.625	210.388		315.978	155.05	142.616	334.204

## Sheet: 24-36hpf
DMSO	1	2	3	4	5	6	7	8	9
	Total head length	length ceratohyal to anterior end	length ceratohyal to posterior end	Width MP	Width CP	Length ceratohyal superior	Length ceratohyal inferior	Length ethmoid plate (ET)	Lat length Meckel’s (MC)
1	607.727	141.614	466.113	282.105	359.112	213.714	216.976	356.295	114.197
2	577.218	166.009	411.209	243.997	338.74	207.393	199.815	286.482	110.615
3	597.441	197.799	399.641	241.798	360.854	192.511	200.116	311.605	110.615
4	600.156	196.847	403.309	256.826	356.088	170.335	211.165	323.579	107
5	654.152	213.067	441.085	226.476	304.227	211.848	204.702	353.081	141.424
6	584.493	161.355	423.138	280.262	402.082	228.154	235.095	307.531	97.4
7	618.122	181.707	436.414	235.61	336.233	209.263	199.759	325.034	156.267
8	624.759	193.432	431.327	220.828	303.511	212.127	212.633	288.092	134.171
9	600.619	185.484	415.135	263.103	345.602	192.66	208.465	337.733	105.895
10	649.41	182.546	466.863	246.259	305.163	223.78	227.174	345.273	133.312
11	624.858	221.806	403.052	248.35	343.731	191.508	215.782	319.384	137.476
12	603.5	176.693	426.807	245.139	335.064	225.785	209.806	389.495	121.211
13	622.976	184.523	438.452	245.637	317.85	219.689	217.84	338.137	137.583
14	496.838	146.964	349.874	176.918	265.32	169.332	171.795	272.439	127.58
15	647.914	209.563	438.351	261.239	348.514	223.229	229.259	361.445	132.421
16	544.22	111.565	432.655	220.899	321.071	204.571	207.232	275.645	143.839
17	593.304	167.347	425.957	249.162	299.694	210.216	210.375	330.171	122.721
18	603.399	179.638	423.761	273.473	348.31	215.022	218.646	324.934	123.922
19	620.879	202.021	418.858	252.288	350.614	200.439	209.44	336.735	127.956
20	571.844	172.923	398.92	231.297	288.551	215.267	211.06	323.207	119.797
21	568.318	196.093	372.225	238.933	348.865	190.267	211.52	278.382	100.882
22	649.035	229.968	419.067	251.759	344.672	207.665	202.282	324.573	133.416
23	593.952	153.958	439.995	247.219	327.168	223.329	223.038	341.59	122.819
24	577.586	164.767	412.819	255.96	326.091	198.267	190.564	291.249	108.852
25	583.395	184.523	398.871	257.201	296.798	209.139	217.47	331.656	117.52
1 µM	1	2	3	4	5	6	7	8	9
	Total head length	length ceratohyal to anterior end	length ceratohyal to posterior end	Width MP	Width CP	Length ceratohyal superior	Length ceratohyal inferior	Length ethmoid plate (ET)	Lat length Meckel’s (MC)
1	573.565	156.374	417.19	226.084	291.376	208.265	202.081	333.214	145.686
2	569.167	178.776	390.391	223.726	328.309	199.035	226.967	298.407	100.69
3	573.188	175.32	397.868	266.34	326.196	204.535	208.199	322.941	154.803
4	637.861	165.573	472.287	194.862	240.847	220.076	216.327	359	154.468
5	591.323	153.741	437.582	227.215	280.539	221.133	210.669	343.977	137.657
6	620.023	185.803	434.22	210.709	298.629	223.403	228.352	329.406	123.06
7	612.886	174.282	438.604	229.509	295.914	210.884	195.772	262.252	113.741
8	490.833	149.499	341.334	199.593	281.853	159.712	167.573	237.784	97.9687
9	639.885	215.164	424.721	248.786	379.433	206.103	210.568	353.073	135.324
10	565.391	154.342	411.049	255.036	334.442	220.563	214.591	300.193	106.991
11	507.068	166.66	340.408	224.988	342.579	188.571	190.476	275.405	104.293
12	579.148	166.643	412.505	233.959	304.725	202.849	208.98	312.322	107.371
13	448.876	136.054	312.822	224.457	282.948	187.543	218.167	293.247	120.775
14	600.829	163.746	437.082	238.293	342.106	210.159	216.365	381.899	117.937
15	591.785	231.356	360.429	259.953	322.461	192.837	181.504	343.794	125.952
16	587.006	180.461	406.546	242.727	359.928	214.539	211.974	283.846	120.66
17	525.217	170.073	355.144	209.882	279.313	194.424	187.439	337.162	126.15
18	613.829	175.7	438.129	246.394	349.671	224.407	217.636	331.223	119.921
19	579.656	163.407	416.249	239.769	328.297	212.789	215.035	309.779	100.91
20	572.501	179.72	392.78	236.645	342.106	208.323	202.039	309.511	95.3259
21	498.103	190.248	307.856	199.963	326.567	166.971	160.533	236.333	116.88
22	549.068	178.978	370.09	225.297	311.395	195.412	189.042	322.015	121.211
23	642.163	211.148	431.016	281.241	369.018	206.453	215.005	363.256	138.802
24	586.302	167.076	419.227	257.758	340.759	224.98	219.87	298.33	121.941
2.5 µM	1	2	3	4	5	6	7	8	9
	Total head length	length ceratohyal to anterior end	length ceratohyal to posterior end	Width MP	Width CP	Length ceratohyal superior	Length ceratohyal inferior	Length ethmoid plate (ET)	Lat length Meckel’s (MC)
1	552.319	146.649	405.67	235.024	336.418	200.116	200.462	288.686	118.14
2	572.054	152.872	419.182	226.112	310.708	177.44	189.746	325.608	103.303
3	540.884	157.788	383.097	193.776	257.528	196.597	202.337	301.789	133.396
4	552.989	148.356	404.633	198.192	275.899	207.433	189.527	281.724	127.92
5	549.584	144.121	405.463	203.273	276.043	201.664	200.106	298.112	107.371
6	597.761	151.235	446.526	228.008	295.248	220.391	207.946	289.552	119.735
7	580.614	138.782	441.831	260.22	316.22	197.897	205.726	332.335	119.62
8	565.227	153.253	411.973	229.061	260.092	199.685	195.374	320.452	120.775
9	583.529	169.769	413.76	227.325	302.598	201.664	191.567	323.32	119.31
10	541.146	180.599	360.547	191.914	272.384	164.53	175.884	292.897	95.3259
11	567.873	202.021	365.852	235.767	314.354	187.799	185.319	320.33	123.75
12	624.012	206.269	417.742	258.861	334.799	188.061	218.438	360.989	123.817
13	550.88	162.476	388.404	264.443	279.18	190.228	199.239	304.485	100.91
14	626.103	221.835	404.267	291.693	370.318	209.776	206.807	353.88	115.269
15	634.38	193.503	440.877	258.439	365.275	215.473	206.319	325.824	103.339
16	594.991	151.32	443.671	247.622	316.001	208.372	226.084	320.217	127.376
17	533.644	139.825	393.818	211.869	273.804	197.016	195.09	269.789	93.966
18	544.88	304.956	239.923	219.874	328.297	180.829	171.477	330.489	113.252
19	643.95	194.919	449.031	242.192	325.651	204.182	211.869	325.048	115.678
20	554.221	163.724	390.497	238.484	299.323	208.025	212.359	315.238	127.776
21	570.359	160.827	409.533	230.077	241.062	208.465	195.483	323.526	108.52
22	609.907	179.921	429.986	245.139	313.165	190.961	212.876	331.946	114.577
23	595.928	171.434	424.494	269.473	333.469	210.867	216.941	335.049	114.577
5 µM	1	2	3	4	5	6	7	8	9
	Total head length	length ceratohyal to anterior end	length ceratohyal to posterior end	Width MP	Width CP	Length ceratohyal superior	Length ceratohyal inferior	Length ethmoid plate (ET)	Lat length Meckel’s (MC)
1	577.473	156.746	420.727	206.269	276.482	183.95	182.561	280.856	132.372
2	624.022	217.763	406.259	236.284	309.346	191.567	204.919	327.576	102.872
3	653.367	240.851	412.516	214.97	300.708	168.318	183.391	324.42	117.204
4	602.935	171.865	431.069	200.041	273.469	189.39	204.535	345.034	129.731
5	533.43	142.916	390.514	210.994	286.038	184.964	191.45	297.92	103.437
6	523.521	148.356	375.165	208.701	280.816	178.895	190.189	285.744	131.467
7	622.736	161.905	460.831	219.2	288.118	223.829	210.937	299.671	143.89
8	588.233	206.453	381.78	229.739	294.259	174.77	177.44	297.333	98.7218
9	578.284	157.964	420.32	211.336	236.379	197.616	187.464	300.634	139.898
10	577.255	141.248	436.007	214.742	295.025	191.856	181.254	319.382	103.616
11	592.237	147.039	445.197	239.842	334.135	204.688	206.95	288.233	107.276
12	600.618	166.187	434.431	234.112	325.992	203.964	213.102	301.397	114.448
13	639.496	168.015	471.481	266.396	359.969	222.065	231.393	295.969	139.308
14	607.377	167.618	439.759	242.177	359.495	207.946	218.265	330.615	77.849
15	587.796	165.992	421.804	243.541	322.682	192.756	213.761	298.778	118.547
16	575.512	179.921	395.591	223.544	313.885	204.86	197.199	322.736	118.5
17	524.018	220.614	303.404	197.579	275.103	165.518	157.788	302.289	108.92
18	616.522	196.678	419.844	233.019	356.535	203.854	210.607	262.902	103.437
19	439.515	189.116	250.399	205.442	326.576	147.02	155.424	272.598	97.3619
20	609.907	124.711	485.196	251.793	336.85	204.1	202.177	323.811	105.956
21	576.264	155.484	420.78	249.013	324.839	198.332	220.916	304.905	97.751
22	556.757	157.969	398.788	212.872	306.558	166.259	182.359	291.642	91.1667
10 µM	1	2	3	4	5	6	7	8	9
	Total head length	length ceratohyal to anterior end	length ceratohyal to posterior end	Width MP	Width CP	Length ceratohyal superior	Length ceratohyal inferior	Length ethmoid plate (ET)	Lat length Meckel’s (MC)
1	632.709	242.212	390.497	243.674	351.116	170.612	193.202	328.994	115.742
2	558.118	196.088	362.03	231.393	307.847	192.958	184.764	328.235	105.956
3	566.749	157.171	409.578	206.418	305.456	195.867	192.434	303.306	91.2476
4	581.531	181.075	400.456	201.664	308.891	172.339	180.137	327.753	104.903
5	618.289	188.37	429.919	228.008	308.684	192.564	213.714	350.173	127.456
6	559.25	191.88	367.369	213.714	310.216	199.463	189.355	355.444	109.2
7	571.745	169.059	402.686	204.449	266.09	189.819	196.72	339.297	106.262
8	495.35	251.171	244.179	210.924	308.352	181.641	146.718	307.116	110.237
9	525.559	178.237	347.322	204.371	326.542	181.937	185.034	307.982	92.3769
10	541.747	191.175	350.572	219.996	313.132	191.45	180.85	314.313	109.867
11	566.198	194.729	371.469	268.114	344.744	205.726	196.565	285.959	113.741
12	540.83	223.167	317.663	208.203	290.514	154.803	147.197	311.838	105.405
13	557.965	186.414	371.55	219.052	333.433	188.306	182.724	291.787	114.94
14	590.553	176.892	413.661	235.378	307.495	193.963	191.701	318.247	114.035
15	541.608	167.369	374.239	193.202	253.193	161.171	163.016	280.194	96.5986
16	509.91	212.301	297.608	205.712	317.622	187.464	189.429	307.676	112.193
17	438.47	196.259	242.212	173.99	341.353	148.91	149.582	269.207	92.9646
18	525.401	193.202	332.199	233.05	274.951	183.149	172.252	311.761	113.848
19	538.867	182.724	356.143	232.975	296.039	176.499	170.612	300.131	100.247
20	562.937	187.799	375.138	228.77	321.193	186.811	189.16	324.081	96.2048
21	534.297	157.171	377.126	216.297	290.997	191.508	198.965	341.861	110.874
22	587.881	204.449	383.432	242.727	343.637	197.443	199.239	364.543	111.573
23	574.416	143.381	431.035	207.946	261.146	177.356	191.45	321.161	132.372
24	517.714	168.29	349.424	192.333	289.962	164.463	175.848	283.934	127.005
25	571.227	141.084	430.143	205.546	292.555	199.754	197.748	322.752	116.157
